# Supplementary material for: Target capture data resolve recalcitrant relationships in the coffee family (Rubioideae, Rubiaceae)
Source: Front Plant Sci. 2022 Sep 8;13:967456. doi: 10.3389/fpls.2022.967456 (PMC9493367; doi:10.3389/fpls.2022.967456)
Supplement: Supplementary file 1 [file Table_1.xlsx]

## Sheet: Sheet1
Supplementary Table 1. Taxa, voucher/source, library, ENA, and sequencing information for sequences used in this study.
Species	Collection/Source	Collection year	Locality	Lab ID	# Reads	# Duplicates	Proportion duplicates	# Duplicates + trimmed	Proportion duplicates + trimmed	# Reads after deduplication	# Reads after dedupe and trimming	ENA accession
Rubia cordifolia subsp. conotricha (Gand.) Verdc.	P.A. Luke & W.R.Q Luke 9510 (UPS)	2003	Tanzania	BO005a	29593696	5667424	0.191508	8788780	0.296981	23926272	20804916	ERR9883467
Prismatomeris fragrans E.T.Geddes	Kainulainen et al. 39 (S)	2009	Vietnam	CA031	17918328	5214690	0.291025	6621390	0.369532	12703638	11296938	ERR9883468
Faramea multiflora A.Rich. ex DC.	Salino 3825 (MO )	1997	Brazil	DB007a	22738412	4408656	0.193886	7579864	0.333351	18329756	15158548	ERR9883469
Paracorynanthe antankarana Capuron ex J.-F.Leroy	B. Bremer et al. 5156 (S)	2008	Madagascar	DE066a	18161814	3893694	0.214389	5592970	0.307952	14268120	12568844	ERR9883470
Carpacoce spermacocea (Rchb. ex Spreng.) Sond.	Bremer et al. 4385 (UPS)	2002	South Africa	DE067	37320576	8309996	0.222665	13452264	0.360452	29010580	23868312	ERR9883471
Cinchona calisaya Wedd.	S.G. Razafimandimbison & A. Razafimanantsoa 471 (UPS)	2002	Madagascar	DE068	36073154	8565914	0.23746	13257688	0.367522	27507240	22815466	ERR9883472
Saldinia pallida Bremek.	Bremer et al. 4038-BB38 (UPS)	2000	Madagascar	AA052a	54394772	9314402	0.171237	15015830	0.276053	45080370	39378942	ERR9883473
Rubia cordifolia subsp. conotricha (Gand.) Verdc.	P.A. Luke & W.R.Q Luke 9510 (UPS)	2003	Tanzania	BO005b	16280134	2812946	0.172784	4811496	0.295544	13467188	11468638	ERR9883474
Paracorynanthe antankarana Capuron ex J.-F.Leroy	B. Bremer et al. 5156 (S)	2008	Madagascar	DE066b	25290774	5525334	0.218472	7912364	0.312856	19765440	17378410	ERR9883475
Saldinia pallida Bremek.	Bremer et al. 4038-BB38 (UPS)	2000	Madagascar	AA052b	31049368	5483428	0.176604	8754438	0.281952	25565940	22294930	ERR9883476
Faramea multiflora A.Rich. ex DC.	Salino 3825 (MO)	1997	Brazil	DB007b	18382370	4592600	0.249837	6435174	0.350073	13789770	11947196	ERR9883477
Danais nigra Homolle	N. S. Rasoanaivo & A. J. Tahinarivony 69 (S)	2012	Madagascar	DB070	28401574	7062920	0.248681	9900516	0.34859	21338654	18501058	ERR9883478
Gaertnera obovata Baker	Razafimandimbison et al. 980 (S)	2011	Madagascar	CI009	7348770	1697022	0.230926	2237084	0.304416	5651748	5111686	ERR9883479
Puffia gerrardii (Baker) Razafim. & B.Bremer	Razafimandimbison et al. 1244 (S)	2013	Madagascar	CM050	10355364	2998862	0.289595	3703278	0.357619	7356502	6652086	ERR9883480
Cyanoneuron cyaneum (Hallier f.) Tange	Bogner 1457 (L)		Borneo, Indonesia	BZ084	20936532	6496866	0.310312	8150826	0.389311	14439666	12785706	ERR9883481
Exallage chrysotricha (Palib.) Neupane & N.Wikstr.	Lin Qinzhong 2004180 (MO)	2004	China	BZ040	12728686	3526414	0.277045	4353772	0.342044	9202272	8374914	ERR9883482
Psychotria mahonii C.H.Wright	Luke 8370 (UPS)	2002	Kenya	AG024	7578712	1907428	0.251682	2340292	0.308798	5671284	5238420	ERR9883483
Alseis lugonis L.Andersson	Bremer et al. 3353 (UPS)	1995	Ecuador	BD032	17565658	3758552	0.213972	5162544	0.2939	13807106	12403114	ERR9883484
Craterispermum Benth.	Razafimandimbison et al. 1168 (S)	2011	Madagascar	CK013	11873116	3896382	0.328168	4813090	0.405377	7976734	7060026	ERR9883485
Psychotria ankarensis (Bremek.) Razafim. & B.Bremer	Razafimandimbison et al. 405 (UPS)	2002	Madagascar	AF076	4573052	1064512	0.232779	1360202	0.297439	3508540	3212850	ERR9883486
Serissa foetida (L.f.) Lam.	Bremer 2735 (UPS)	1988	Cult. in Kew Botanical Garden 65110	C0005	21995130	4318406	0.196335	6297612	0.286318	17676724	15697518	ERR9883487
Rudgea recurva Müll.Arg.	Pirani et al. 4899 (SPF)	2001	Brazil	AE034	11091386	2768398	0.249599	3387750	0.30544	8322988	7703636	ERR9883488
Leptostigma pilosum (Benth.) Fosberg	Asplund 7171 (UPS)	1939	Ecuador	CX099	5849386	1234016	0.210965	1668288	0.285207	4615370	4181098	ERR9883489
Urophyllum arboreum (Reinw. ex Blume) Korth.	Boeea 7887 (S)	1935	Sumatra	BA031	4866420	1022288	0.21007	1398048	0.287285	3844132	3468372	ERR9883490
Seychellea sechellarum (Baker) Razafim., Kainul. & Rydin	C. Morel 57a (SEY)		Seychelles	CM080	10070966	2072186	0.205758	2997456	0.297633	7998780	7073510	ERR9883491
Diodella sarmentosa (Sw.) Bacigalupo & E. L. Cabral	Bremer et al. 5229 (S)	2008	Madagascar	CG025	11208492	2931092	0.261506	3686084	0.328865	8277400	7522408	ERR9883492
Phyllis nobla L.	Wikström et al. 76 (S)	1994	Tenerife	CY051	19034514	3670256	0.192821	4845010	0.254538	15364258	14189504	ERR9883493
Mycetia bracteata Hutch.	Steward & Cheo 1105 (S)	1933	China	CD007	14319208	2281984	0.159365	3607392	0.251927	12037224	10711816	ERR9883494
Amphidasya longicalycina (Dwyer) C.M.Taylor	Huber 2963 (CR)		Costa Rica	AX027	10121102	2420952	0.239198	3068096	0.303139	7700150	7053006	ERR9883495
Chamaepentas hindsioides (K.Schum.) Kårehed & B.Bremer	Iversen et al. 85101 (UPS)	1985	Tanzania	AI014	15080956	3366902	0.223255	4461488	0.295836	11714054	10619468	ERR9883496
Ophiorrhiza darwinii Razafim. & Rydin	Swenson et al. 1411 (S)	2013	Vietnam	CY100	19052868	4908056	0.257602	5979780	0.313852	14144812	13073088	ERR9883497
Craterispermum schweinfurthii Hiern	J. D & E. G. Chapman 9364 (UPS)	1988	Malawi	CL038	10797380	1788592	0.165651	3254992	0.301461	9008788	7542388	ERR9883498
Nertera dichondrifolia (A.Cunn.) Hook.f.	Tibell NZ119 (UPS)	1980	New Zealand	CY003	13746080	3105684	0.225932	3946072	0.287069	10640396	9800008	ERR9883499
Glionnetia sericea (Baker) Tirveng.	Beaver 3 (S)	2009	Seychelles	CA098	12049402	2948902	0.244734	3940186	0.327003	9100500	8109216	ERR9883500
Ronabea latifolia Aubl.	Contreras 9152 (S)		Guatemala	AZ001	14480068	2739938	0.189221	4645884	0.320847	11740130	9834184	ERR9883501
Pagamea capitata Benth.	Pipoly 9176 (MEXU)	1986	Guyana	CA030	16430902	4789198	0.291475	6001850	0.365278	11641704	10429052	ERR9883502
Luculia pinceana Hook.	Thin et al. 3061 (AAU)		Vietnam	AZ040	19695422	6494530	0.329748	8113350	0.411941	13200892	11582072	ERR9883503
Lasianthus strigosus Wight	Bremer & Bremer 3902 (UPS)	1998	Australia	CH072	15412824	3903956	0.253293	4990974	0.32382	11508868	10421850	ERR9883504
Dunnia sinensis Tutcher	Xinhui 16 (in Ge et al, 2002)		China	BC005	20485484	5032506	0.245662	6251714	0.305178	15452978	14233770	ERR9883505
Schizocolea linderi (Hutch. & Dalziel) Bremek.	Adam 20116 (UPS)	1964	Liberia	CH081b	5538950	1188592	0.214588	1590518	0.287152	4350358	3948432	ERR9883506
Plocama dubia (Aitch. & Hemsl.) N. Backlund & Thulin	Rafei & Zangooei 25651 (FUHM)			AH009	8683162	1916704	0.220738	2532384	0.291643	6766458	6150778	ERR9883507
Spermadictyon suaveolens Roxb.	Bremer 3133 (UPS)	1988	Cult. in Paris Botanical Garden	B0110	18039662	4146154	0.229835	5326724	0.295278	13893508	12712938	ERR9883508
Kelloggia galioides Torr.	Holmgren et al. 2437 (UPS)	1965	United States, Utah	T0054a	21167374	7520474	0.355286	9015272	0.425904	13646900	12152102	ERR9883509
Schradera rotundata Standl. ex Steyerm.	Gentry 5641 (S)		Panama	CA038	12251396	3260670	0.266147	4038188	0.32961	8990726	8213208	ERR9883510
Mitchella repens L.	Atha and Gonzalez 1443a (MEXU)	1997	United States, Texas	BZ092	14231080	2825914	0.198573	3660056	0.257188	11405166	10571024	ERR9883511
Normandia neocaledonica Hook.f.	Selling 125b (S)	1949	New Caledonia	DE075	23523616	8014056	0.340681	10051166	0.42728	15509560	13472450	ERR9883512
Paederia ciliata (Bartl. ex DC.) Standl.	Campos et al. 4919 (MEXU)	1992	Mexico	CA022	18234624	4020394	0.220481	5726786	0.314061	14214230	12507838	ERR9883513
Colletoecema dewevrei (De Wild.) E.M.A.Petit	Lisowski 47195 (K)	1977	Congo	BD002a	28212410	7778942	0.275728	10454316	0.370557	20433468	17758094	ERR9883514
Theligonum japonicum Ôkubo & Makino	Togashi 6807 (P)	1968	Japan	BV076a	31265996	4804914	0.153679	9247266	0.295761	26461082	22018730	ERR9883515
Appunia guatemalensis Donn.Sm.	Contreras 8983 (S)	1969	Guatemala	AQ075	8058292	1723730	0.213908	2179256	0.270436	6334562	5879036	ERR9883516
Raritebe palicoureoides Wernham	Antonio 1697 (AAU)		Panama	AY100	14164278	3261068	0.230232	4177442	0.294928	10903210	9986836	ERR9883517
Theligonum japonicum Ôkubo & Makino	Togashi 6807 (P)	1968	Japan	BV076b	51618458	5891054	0.114127	16410370	0.317917	45727404	35208088	ERR9883518
Schizocolea linderi (Hutch. & Dalziel) Bremek.	Adam 20116 (UPS)	1964	Liberia	CH081a	15644334	3131186	0.200148	4122318	0.263502	12513148	11522016	ERR9883519
Argostemma elatostemma Hook.f.	Bremer and Bremer 1722 (S)	1979	Malaysia, Sarawak	BL040	17954584	3944992	0.219721	5290152	0.294641	14009592	12664432	ERR9883520
Rennellia subsessilis (King & Gamble) Razafim. & Rydin	Y.W. Low & Wong LYW 359 (KLU)		Malaysia	CB078	22286988	4720524	0.211806	5934462	0.266275	17566464	16352526	ERR9883521
Sherardia arvensis L.	Andreasen 345 (SBT)	2002	Cult. in Bergius Botanical Garden	AG064	33163534	9771174	0.294636	11967966	0.360877	23392360	21195568	ERR9883522
Schradera nervulosa (Stapf) Puff, R.Buchner & Greimler	Puff 961216-2/2 (WU)		Borneo (Sabah)	CX040	29220602	6346338	0.217187	8311762	0.284449	22874264	20908840	ERR9883523
Pseudopyxis heterophylla (Miq.) Maxim.	K.Å. Dahlstrand s.n. (GB)	1950	Japan	BX093	32861052	8317748	0.253119	10603158	0.322666	24543304	22257894	ERR9883524
Otiophora caerulea (Hiern) Bullock	Dessein 367 (BR)	2004	Zambia	AP063	12410108	3187288	0.25683	3838520	0.309306	9222820	8571588	ERR9883525
Ophiorrhiza mungos L.	USA Typhus Commission 525 (S)			CZ012	13801296	2595152	0.188037	3349842	0.242719	11206144	10451454	ERR9883526
Gynochthodes officinalis (F.C.How) Razafim. & B.Bremer	Krüger et al. 9 (S)	2009	Vietnam	BZ099	28082622	6780498	0.241448	8527708	0.303665	21302124	19554914	ERR9883527
Didymaea alsinoides (Schltdl. & Cham.) Standl.	Keller 1901 (CAS)			M0004	15068534	3815764	0.253227	4648682	0.308503	11252770	10419852	ERR9883528
Plocama tinctoria (Balf.f.) M.Backlund & Thulin	Thulin 10946 (UPS)	2002	Somalia	AH008	28219454	6790872	0.240645	9633142	0.341365	21428582	18586312	ERR9883529
Airosperma vanuense S.P.Darwin	Smith 8214 (P)	1953	Fiji	AP035	13696808	3109396	0.227016	3940194	0.287672	10587412	9756614	ERR9883530
Sabicea marojejyensis Razafim. & J.S.Mill.	Bremer et al. 5293 (S)	2008	Madagascar	CG080	29152786	8371132	0.287147	10420684	0.357451	20781654	18732102	ERR9883531
Anthospermum thymoides Baker	Thureborn et al. 33 (S)	2017	Madagascar	DE070	18570024	4204244	0.226399	5683434	0.306054	14365780	12886590	ERR9883532
Coccocypselum condalia Pers.	Persson, C. & Gustafsson, C. 246 (GB)	1996	Bolivia	BA061	17334364	4036378	0.232854	4995180	0.288166	13297986	12339184	ERR9883533
Rondeletia intermixta Britton	Rova et al. 2245 (GB)	1995	Cuba	AG098	28911420	7287144	0.252051	9314628	0.322178	21624276	19596792	ERR9883534
Deppea grandiflora Schltdl.	Marino Rosas R. 1015 (P)	1968	Mexico	CC071	18027648	4762552	0.26418	6427346	0.356527	13265096	11600302	ERR9883535
Cruckshanksia pumila Clos in C.Gay	Taylor et al. 10679 (MO)	1991	Chile	DA042	23983720	4149852	0.173028	5993222	0.249887	19833868	17990498	ERR9883536
Opercularia volubilis R.Br. ex Benth.	B.J. Lepschi & B.A. Fuhrer BJL 3671 (P)	1997	Australia	CY089	16285680	3500906	0.214968	4802854	0.294913	12784774	11482826	ERR9883537
Galium polyacanthum (Baker) Puff	Thureborn et al. 32 (S)	2017	Madagascar	DE065	9766552	2499290	0.255903	3593428	0.367932	7267262	6173124	ERR9883538
Payera decaryi (Homolle) Buchner & Puff	Krüger & Razafimandimbison 74 (S)	2010	Madagascar	DB077	39118322	9469992	0.242086	12162894	0.310926	29648330	26955428	ERR9883539
Acranthera grandiflora Bedd.	J. Klackenberg & R. Lundin 541 (S)	1982	India, Tamil Nadu	BD003	12517804	2371380	0.189441	3473158	0.277457	10146424	9044646	ERR9883540
Triainolepis xerophila (Bremek.) Kårehed & B.Bremer	Thureborn et al. 11 (S)	2017	Madagascar	DE064	72321364	14654900	0.202636	22081754	0.305328	57666464	50239610	ERR9883541
Coprosma rhamnoides A.Cunn.	Tibell NZ46 (UPS)	1980	New Zealand	CY012	19532824	4473110	0.229005	5676882	0.290633	15059714	13855942	ERR9883542
Lecananthus erubescens Jack	Van Niel 3406 (L)		Borneo, Indonesia	BZ091	15743792	3347294	0.21261	4511782	0.286575	12396498	11232010	ERR9883543
Coptosapelta diffusa (Champ. ex Benth.) Steenis	Steward et al 594 (S)	1931	China	AY008	12395740	2273288	0.183393	3486378	0.281256	10122452	8909362	ERR9883544
Trichostachys microcarpa K.Schum.	Masens 834 (BR)	1991	Congo	BE046	17735408	4262196	0.240321	5966582	0.336422	13473212	11768826	ERR9883545
Pomax umbellata (Gaertn.) Sol. ex A.Rich.	Halford Q9744 (BRI)	2009	Australia	DE074	23773874	5086280	0.213944	7249350	0.304929	18687594	16524524	ERR9883546
Leptodermis potaninii Batalin	Andreasen 230 (UPS)	1993	Cult. Quarryhill Botanical Garden	P0085	21647016	4180938	0.193142	6513502	0.300896	17466078	15133514	ERR9883547
Wendlandia dasythyrsa Miq.	Christensen, H. M. 460 (AAU)	1993	Malaysia	BE034	59563474	11915894	0.200054	17198410	0.288741	47647580	42365064	ERR9883548
Molopanthera paniculata Turcz.	Williams & Assis 6861 (S)	1945	Brazil	AV015	30205746	5701968	0.188771	8906346	0.294856	24503778	21299400	ERR9883549
Mouretia larsenii Tange	van Beusekom 4743 (P)	1972	Thailand	CH091	25913050	4708162	0.181691	7672624	0.296091	21204888	18240426	ERR9883550
Colletoecema dewevrei (De Wild.) E.M.A.Petit	Lisowski 47195 (K)	1977	Congo	BD002b	19390822	3972462	0.204863	5823310	0.300313	15418360	13567512	ERR9883551
Oldenlandia herbacea (L.) Roxb.	Thureborn et al. 27 (S)	2017	Madagacar	DE079	40720564	9175912	0.225339	12311608	0.302344	31544652	28408956	ERR9883552
Morinda citrifolia L.	Razafimandimbison 1212a (S)	2013	Madagascar	CV018	33787606	7719936	0.228484	10764100	0.318581	26067670	23023506	ERR9883553
Ixora javanica (Blume) DC.	Puff 000512-1/2 (WU)		Vietnam	CX014	34412464	6387824	0.185625	9902588	0.287762	28024640	24509876	ERR9883554
Neurocalyx zeylanicus Hook.	Bremer & Bremer 937 (S)	1977	Sri Lanka	CH086	23475318	6018598	0.25638	7461234	0.317833	17456720	16014084	ERR9883555
Lasianthus Jack	Razafimandimbison et al. 718 (S)	2009	Vietnam	CQ058	24695636	6574486	0.266221	8333776	0.337459	18121150	16361860	ERR9883556
Palicourea alpina (Sw.) DC.	Rova 2246 (GB)	1995	Cuba	BH070	24688088	4345482	0.176015	6864644	0.278055	20342606	17823444	ERR9883557
Neohymenopogon parasiticus (Wall.) Bennet	Bremer 2743 (UPS)		Cult.	BK078	10077246	2135236	0.211887	2937450	0.291493	7942010	7139796	ERR9883558
Calycosia lageniformis (Gillespie) A.C.Sm.	Callmander et al. 962 (S)		Fiji	CL028	7437180	1710856	0.230041	2341534	0.314842	5726324	5095646	ERR9883559
Kelloggia galioides Torr.	Holmgren et al. 2437 (UPS)	1965	United States, Utah	T0054b	36802524	8117546	0.22057	10113590	0.274807	28684978	26688934	ERR9883560
Perama hirsuta Aubl.	Andersson et al. 1990 (GB)		French Guiana	AM028	35332308	8582780	0.242916	11030826	0.312202	26749528	24301482	ERR9883561
Temnopteryx sericea Hook.f.	Tabak 999 (WAG)		Gabon	AS084	16431558	5549926	0.33776	6805444	0.414169	10881632	9626114	ERR9883562
Clarkella nana (Edgew.) Hook.f.	Maxwell 02-252 (MO)			BU095	8766390	1575346	0.179703	2386952	0.272284	7191044	6379438	ERR9883563
Durringtonia paludosa R.J.F.Hend. & Guymer	Thompson 18m11 (BRI)	2001	Australia, Queensland	DE081	13484562	2601572	0.19293	3686748	0.273405	10882990	9797814	ERR9883564
Galopina aspera (Eckl. & Zeyh.) Walp.	Phillipson 1461 (UPS)	1986	South Africa	CX098	12988930	2800246	0.215587	4932370	0.379736	10188684	8056560	ERR9883565
Lerchea bracteata Valeton	Axelius 343 (S)	1983	Indonesia, Sumatra	AX046	41780688	10060576	0.240795	13625522	0.32612	31720112	28155166	ERR9883566
Schismatoclada marojejyensis Humbert	Bremer et al. 5309 (S)	2008	Madagascar	DC094	31643300	7057476	0.223032	9288986	0.293553	24585824	22354314	ERR9883567
Urophyllum cyphandrum Stapf	Antonelli et al. (2021)/PAFTOL				2208880	420350	0.1903	634522	0.28726	1788530	1574358	ERR5033613
Razafimandimbisonia minor (Baill.) Kainul. & B.Bremer	Antonelli et al. (2021)/PAFTOL				2664202	493974	0.185412	751856	0.282207	2170228	1912346	ERR5033626
Corynanthe pachyceras K.Schum.	Antonelli et al. (2021)/PAFTOL				3170790	474376	0.149608	847032	0.267136	2696414	2323758	ERR5033631
Craterispermum Benth.	Antonelli et al. (2021)/PAFTOL				3109978	513374	0.165073	853160	0.27433	2596604	2256818	ERR5084275
Chironia baccifera L.	Antonelli et al. (2021)/PAFTOL				2079480	399690	0.192207	595452	0.286347	1679790	1484028	ERR5033620
Alstonia scholaris (L.) R.Br.	Antonelli et al. (2021)/PAFTOL				4954486	1044208	0.21076	1288300	0.260027	3910278	3666186	ERR5034019
Emmenopterys henryi Oliv.	Antonelli et al. (2021)/PAFTOL				2566630	369460	0.143948	671778	0.261735	2197170	1894852	ERR5033635
Ophiorrhiza winkleri Valeton	Antonelli et al. (2021)/PAFTOL				1285762	382666	0.297618	432940	0.336719	903096	852822	ERR5033642
Geniostoma borbonicum (Lam.) Spreng.	Antonelli et al. (2021)/PAFTOL				7483328	1693238	0.226268	2062758	0.275647	5790090	5420570	ERR5034022
Calycosia petiolata A.Gray	Antonelli et al. (2021)/PAFTOL				2041572	575810	0.282042	629110	0.30815	1465762	1412462	ERR5034836
Heinsia crinita (Wennberg) G.Taylor	Antonelli et al. (2021)/PAFTOL				1347028	287966	0.213779	368586	0.273629	1059062	978442	ERR5033638
Paederia thouarsiana Baill.	Antonelli et al. (2021)/PAFTOL				3226458	401356	0.124395	837100	0.259449	2825102	2389358	ERR5033643
Palicourea nitidella (Müll.Arg.) Standl.	Antonelli et al. (2021)/PAFTOL				1301902	255952	0.196599	347600	0.266994	1045950	954302	ERR5033644
Perama dichotoma Poepp.	Antonelli et al. (2021)/PAFTOL				2707778	391660	0.144643	769088	0.284029	2316118	1938690	ERR5033646
Plocama calabrica (L.f.) M.Backlund & Thulin	Antonelli et al. (2021)/PAFTOL				2008800	320858	0.159726	546932	0.272268	1687942	1461868	ERR5033647
Prismatomeris Thwaites	Antonelli et al. (2021)/PAFTOL				1649078	250004	0.151602	431800	0.261843	1399074	1217278	ERR5084277
Psychotria pandurata Verdc.	Antonelli et al. (2021)/PAFTOL				1105584	227172	0.205477	327534	0.296254	878412	778050	ERR5033649
Rubia peregrina L.	Antonelli et al. (2021)/PAFTOL				7010790	2459276	0.350784	3406804	0.485937	4551514	3603986	ERR5033650
Spermacoce L.	Antonelli et al. (2021)/PAFTOL				1665082	314966	0.189159	484186	0.290788	1350116	1180896	ERR5084278
Gaertnera rotundifolia Bojer	Antonelli et al. (2021)/PAFTOL				1135932	134944	0.118796	293298	0.2582	1000988	842634	ERR5033654
Saldinia aegialodes Bremek.	Antonelli et al. (2021)/PAFTOL				2246950	313316	0.139441	597384	0.265864	1933634	1649566	ERR5033656
Mycetia Reinw.	Antonelli et al. (2021)/PAFTOL				3067926	925636	0.301714	1174718	0.382903	2142290	1893208	ERR5084289
Theligonum cynocrambe L.	Antonelli et al. (2021)/PAFTOL				9374964	2383474	0.254238	3411200	0.363863	6991490	5963764	ERR5033810
Cyanoneuron pedunculatum Tange	Antonelli et al. (2021)/PAFTOL				1606136	893338	0.556203	929496	0.578716	712798	676640	ERR5034803
Jackiopsis ornata (Wall.) Ridsdale	Antonelli et al. (2021)/PAFTOL				3884492	1421196	0.365864	1613372	0.415337	2463296	2271120	ERR5033822
Dolianthus montiswilhelmii (P.Royen) A.P.Davis	Antonelli et al. (2021)/PAFTOL				5167534	1446096	0.279843	1598952	0.309423	3721438	3568582	ERR5034835
Coprosma longifolia A.Gray	Antonelli et al. (2021)/PAFTOL				4741010	1081418	0.228099	1323300	0.279118	3659592	3417710	ERR5034025
Cyclophyllum barbatum (G.Forst.) N.Hallé & J.Florence	Antonelli et al. (2021)/PAFTOL				16021144	5283160	0.329762	5787150	0.36122	10737984	10233994	ERR5034026
Kajewskiella trichantha Merr. & L.M.Perry	Antonelli et al. (2021)/PAFTOL				563718	120672	0.214064	138832	0.246279	443046	424886	ERR5034845
Chaetostachydium barbatum Ridsdale	Antonelli et al. (2021)/PAFTOL				976848	282586	0.289283	306766	0.314037	694262	670082	ERR5034846
Coelospermum paniculatum F.Muell.	Antonelli et al. (2021)/PAFTOL				2080314	659840	0.317183	809568	0.389157	1420474	1270746	ERR5034257
