# Supplementary material for: Target capture data resolve recalcitrant relationships in the coffee family (Rubioideae, Rubiaceae)
Source: Front Plant Sci. 2022 Sep 8;13:967456. doi: 10.3389/fpls.2022.967456 (PMC9493367; doi:10.3389/fpls.2022.967456)
Supplement: Supplementary file 2 [file Table_2.xlsx]

## Sheet: seq_stats_hybpiper
Supplementary Table 2. Recovery summary statistics. Number of genes recovered at percentage of target length were calculated relative to the "default" Angiosperm353 target file (Johnson et al., 2016). Samples highlighted in grey consist of sequence files from two merged libraries.
Name	# Deduplicated and Trimmed Reads	ReadsMapped	PctOnTarget	GenesMapped	GenesWithContigs	GenesWithSeqs	GenesAt25pct	GenesAt50pct	GenesAt75pct	Genesat150pct	ParalogWarnings	Length of concatenated genes (CDS)	Length of concatenated genes (supercontigs)
Saldinia_pallida_AA052	61673872	5000090	8.10731	353	352	343	335	324	288	13	3	260685	784110
Rudgea_recurva_AE034	7703636	693092	8.99695	353	349	338	321	275	190	7	10	199767	493788
Psychotria_ankarensis_AF076	3212850	595344	18.5301	352	346	342	338	321	270	10	6	245331	745625
Psychotria_mahonii_AG024	5238420	685778	13.0913	353	345	330	304	250	161	5	4	185925	420066
Sherardia_arvensis_AG064	21195568	2708077	12.7766	353	350	330	320	279	211	4	5	204375	465637
Rondeletia_intermixta_AG098	19596792	3199538	16.3268	353	352	348	344	333	298	27	9	283308	869835
Plocama_tinctoria_AH008	18586312	1965361	10.5742	353	350	342	340	318	291	13	7	256185	855340
Plocama_rosea_AH009	6150778	1173530	19.0794	353	347	336	331	301	248	7	5	227481	612983
Chamaepentas_hindsioides_AI014	10619468	1313438	12.3682	352	350	345	345	329	292	15	10	260370	845954
Perama_hirsuta_AM028	24301482	2353861	9.68608	352	351	326	326	310	260	10	6	241482	690226
Airosperma_vanuense_AP035	9756614	507709	5.20374	353	351	341	328	278	215	14	2	222351	535154
Otiophora_caerulea_AP063	8571588	1563909	18.2453	353	351	347	339	308	249	8	26	233250	611877
Appunia_guatemalensis_AQ075	5879036	730383	12.4235	352	349	342	332	305	238	4	3	226098	571451
Temnopteryx_sericea_AS084	9626114	2024929	21.0358	353	352	351	349	338	311	23	4	279042	999282
Molopanthera_paniculata_AV015	21299400	2058058	9.66252	353	351	346	340	319	264	16	9	257580	678053
Amphidasya_longicalycina_AX027	7053006	1281627	18.1714	353	352	347	344	328	284	14	2	255048	685965
Lerchea_bracteata_AX046	28155166	2722936	9.67118	353	352	350	349	339	309	22	1	275106	827018
Coptosapelta_diffusa_AY008	8909362	1479333	16.6043	353	352	348	343	317	263	8	1	242799	599573
Raritebe_palicoureoides_AY100	9986836	1537881	15.3991	353	351	348	347	333	300	23	2	272304	892564
Ronabea_latifolia_AZ001	9834184	863966	8.78533	353	347	342	329	294	248	8	6	233985	597164
Luculia_pinceana_AZ040	11582072	2154688	18.6036	353	352	345	338	307	264	21	14	257379	757674
Spermadictyon_suaveolens_B0110	12712938	2232781	17.5631	353	350	346	341	325	285	9	14	249492	733447
Urophyllum_arboreum_BA031	3468372	949368	27.3722	352	351	335	327	278	218	6	26	220698	601927
Coccocypselum_condalia_BA061	12339184	1657562	13.4333	353	350	348	343	327	280	10	3	250458	684861
Dunnia_sinensis_BC005	14233770	3474841	24.4127	353	352	349	348	333	304	13	7	264036	858531
Colletoecema_dewevrei_BD002	31325606	2660051	8.49162	353	351	347	344	334	301	25	9	271029	884882
Acranthera_grandiflora_BD003	9044646	930914	10.2924	353	351	345	340	308	255	14	2	241635	631166
Alseis_lugonis_BD032	12403114	3031777	24.4437	353	352	350	349	335	303	42	9	288978	861235
Wendlandia_dasythyrsa_BE034	42365064	5471854	12.916	353	353	352	348	343	328	92	2	337197	856317
Trichostachys_microcarpa_BE046	11768826	467899	3.97575	353	346	334	315	279	193	4	0	206013	465362
Palicourea_alpina_BH070	17823444	3021711	16.9536	353	348	330	311	266	190	6	4	198780	517221
Neohymenopogon_parasiticus_BK078	7139796	1404062	19.6653	353	350	344	338	309	259	9	1	238347	699399
Argostemma_elatostemma_BL040	12664432	1775584	14.0202	353	349	346	339	309	257	7	7	236475	661734
Rubia_cordifolia_BO005	32273554	2320444	7.18992	353	350	339	329	303	247	7	5	230283	596742
Clarkella_nana_BU095	6379438	700547	10.9813	353	339	310	277	175	86	0	0	136683	247000
Theligonum_japonicum_BV076	57226818	36587446	63.9341	353	349	330	308	246	161	2	4	181527	407731
Pseudopyxis_heterophylla_BX093	22257894	4758583	21.3793	353	351	341	330	307	249	5	7	226638	582942
Exallage_chrysotricha_BZ040	8374914	1771389	21.1511	353	349	337	333	313	263	12	40	235794	709250
Cyanoneuron_cyaneum_BZ084	12785706	2847945	22.2744	353	351	347	345	333	298	14	5	263277	810540
Lecananthus_erubescens_BZ091	11232010	1554288	13.838	353	351	343	337	317	267	5	1	239700	608947
Mitchella_repens_BZ092	10571024	1142433	10.8072	353	351	344	336	317	254	6	4	233607	572982
Gynochthodes_officinalis_BZ099	19554914	3272395	16.7344	353	352	348	346	338	311	14	5	267972	857176
Serissa_foetida_C0005	15697518	2502462	15.9418	353	351	346	342	329	292	11	4	253326	776089
Paederia_ciliata_CA022	12507838	2093937	16.741	353	351	335	329	301	229	5	31	221751	607402
Pagamea_capitata_CA030	10429052	1266875	12.1476	353	351	344	340	319	281	7	6	246249	697814
Prismatomeris_fragrans_CA031	11296938	1461146	12.934	353	351	343	340	325	279	10	2	248475	724114
Schradera_rotundata_CA038	8213208	896586	10.9164	353	349	335	324	286	209	7	23	214686	596349
Glionnetia_sericea_CA098	8109216	1077028	13.2815	353	351	338	330	313	271	50	26	279180	885929
Gentingia_subsessilis_CB078	16352526	1878318	11.4864	353	352	347	341	326	282	8	3	249051	697095
Deppea_grandiflora_CC071	11600302	2293085	19.7675	353	352	350	346	334	303	23	10	279153	842981
Mycetia_bracteata_CD007	10711816	1364937	12.7423	353	349	342	339	314	252	4	2	233430	644858
Diodella_sarmentosa_CG025	7522408	923301	12.274	353	345	330	321	277	221	7	20	212910	536860
Sabicea_marojejyensis_CG080	18732102	3711287	19.8124	353	352	342	340	326	301	49	49	294747	999219
Lasianthus_strigosus_CH072	10421850	2290533	21.9782	353	351	339	333	281	224	9	22	225141	649925
Schizocolea_linderi_CH081	15470448	2042427	13.2021	353	352	346	345	328	285	8	6	254313	749620
Neurocalyx_zeylanicus_CH086	16014084	3647916	22.7794	353	352	351	350	340	306	15	2	276258	835279
Mouretia_larsenii_CH091	18240426	2454539	13.4566	353	352	344	339	321	274	9	5	245760	730084
Gaertnera_obovata_CI009	5111686	457350	8.94715	353	347	340	334	307	256	7	4	234279	691555
Craterispermum_sp_CK013	7060026	981368	13.9003	353	352	350	349	333	301	16	9	265497	901906
Calycosia_lageniformis_CL028	5095646	309524	6.07428	352	318	310	292	242	158	3	3	180678	483511
Craterispermum_schweinfurthii_CL038	7542388	758179	10.0522	352	348	347	344	321	257	9	4	242127	727528
Geophila_gerrardii_CM050	6652086	1514536	22.7678	353	350	345	342	327	283	10	5	253305	773285
Seychellea_sechellarum_CM080	7073510	1340017	18.9442	352	352	347	346	333	296	22	4	266676	853325
Lasianthus_sp._CQ058	16361860	4264122	26.0614	353	352	336	325	295	243	8	33	229641	665268
Morinda_citrifolia_CV018	23023506	2418835	10.5059	353	351	350	346	341	304	13	10	272121	1026757
Ixora_javanica_CX014	24509876	1981222	8.08336	353	351	346	344	328	304	51	3	295794	858099
Schradera_nervulosa_CX040	20908840	2332731	11.1567	353	353	348	342	331	289	12	2	257097	763906
Galopina_aspera_CX098	8056560	1626293	20.1859	353	352	340	335	315	267	10	4	238443	655821
Leptostigma_pilosum_CX099	4181098	508387	12.1592	352	346	336	319	290	218	2	4	214344	538521
Nertera_dichondrifolia_CY003	9800008	879731	8.97684	353	344	335	327	282	223	7	31	221097	656385
Coprosma_rhamnoides_CY012	13855942	2498452	18.0316	352	350	342	339	305	248	8	25	234405	651969
Phyllis_nobla_CY051	14189504	1583395	11.1589	353	351	345	337	319	269	11	7	243282	655697
Opercularia_volubilis_CY089	11482826	1409182	12.2721	353	351	342	335	317	259	9	9	240852	689724
Ophiorrhiza_darwinii_CY100	13073088	2290480	17.5206	353	351	348	344	334	294	18	7	265617	815990
Ophiorrhiza_mungos_CZ012	10451454	1346154	12.8801	353	352	346	338	317	261	9	3	237810	584733
Cruckshanksia_pumila_DA042	17990498	1459436	8.11226	353	348	345	337	306	228	8	5	226713	573897
Faramea_multiflora_DB007	27105744	4842586	17.8655	353	353	348	343	328	287	10	0	256800	761851
Danais_nigra_DB070	18501058	4109228	22.2108	353	352	347	344	331	292	10	10	258024	787830
Payera_decaryi_DB077	26955428	5928267	21.9929	353	352	349	346	336	316	18	10	275445	1007184
Schismatoclada_marojejyensis_DC094	22354314	4333250	19.3844	353	352	348	345	336	306	17	10	270453	987042
Triainolepis_xerophila_DE064	50239610	3353046	6.67411	353	353	344	333	311	256	8	5	235515	679851
Galium_polyacanthum_DE065	6173124	902934	14.6269	353	347	335	324	281	216	6	49	217059	592727
Paracorynanthe_antankarana_DE066	29947254	7506651	25.0662	353	353	350	348	336	311	50	13	301089	945016
Carpacoce_spermacocea_DE067	23868312	2208769	9.25398	353	352	346	342	319	262	13	8	243573	692436
Cinchona_calisaya_DE068	22815466	2288891	10.0322	353	352	350	347	333	284	27	9	272154	723042
Anthospermum_thymoides_DE070	12886590	2124417	16.4855	352	350	343	339	319	277	12	9	247575	708599
Pomax_umbellata_DE074	16524524	1966639	11.9013	353	351	342	339	323	280	10	9	252834	788172
Normandia_neocaledonica_DE075	13472450	2702184	20.0571	352	350	345	342	327	298	15	9	260649	819229
Oldenlandia_herbacea_DE079	28408956	5009761	17.6344	353	350	345	344	335	296	13	8	266181	889934
Durringtonia_paludosa_DE081	9797814	1734842	17.7064	352	351	342	338	309	245	6	6	229530	603397
Didymaea_alsinoides_M0004	10419852	1338401	12.8447	353	348	330	319	273	209	6	50	209967	574142
Leptodermis_potaninii_P0085	15133514	2766766	18.2824	353	350	346	343	327	294	15	8	260739	851596
Kelloggia_galioides_T0054	38841036	3342340	8.60518	353	352	346	342	324	289	8	4	254991	729563
Alstonia_scholaris_PAFTOL	3666186	581883	15.8716	353	348	336	325	297	240	5	44	222294	878646
Calycosia_petiolata_PAFTOL	1412462	257860	18.2561	352	325	318	291	203	121	2	6	160899	381862
Chaetostachydium_barbatum_PAFTOL	670082	103899	15.5054	353	306	297	266	176	102	1	7	141822	325225
Chironia_baccifera_PAFTOL	1484028	122532	8.25672	344	266	260	231	161	102	1	17	124932	373595
Coelospermum_paniculatum_PAFTOL	1270746	388187	30.548	352	343	333	315	253	152	3	2	182031	387092
Coprosma_longifolia_PAFTOL	3417710	395742	11.5792	351	331	328	320	273	212	10	22	213699	642825
Corynanthe_pachyceras_PAFTOL	2323758	351319	15.1186	352	327	324	314	288	233	23	16	240054	801368
Craterispermum_sp._PAFTOL	2256818	368564	16.3311	351	325	325	317	287	234	13	5	222168	770270
Cyanoneuron_pedunculatum_PAFTOL	676640	89345	13.2042	351	312	302	258	181	100	2	0	137490	272465
Cyclophyllum_barbatum_PAFTOL	10233994	1382636	13.5102	353	348	336	325	286	215	11	8	220482	483802
Dolianthus_montiswilhelmii_PAFTOL	3568582	707017	19.8123	353	344	335	316	256	176	2	7	189801	452523
Emmenopterys_henryi_PAFTOL	1894852	324666	17.1341	351	321	318	304	261	211	23	25	223800	752011
Gaertnera_rotundifolia_PAFTOL	842634	79514	9.43636	340	223	221	208	167	112	4	0	128526	389085
Geniostoma_borbonicum_PAFTOL	5420570	738191	13.6183	352	342	331	322	275	212	6	23	211641	737798
Heinsia_crinita_PAFTOL	978442	196906	20.1244	352	328	321	308	248	186	19	0	205152	533267
Jackiopsis_ornata_PAFTOL	2271120	253880	11.1786	351	334	321	299	230	144	8	2	177351	362341
Kajewskiella_trichantha_PAFTOL	424886	149455	35.1753	348	322	312	267	187	109	1	0	144306	266504
Mycetia_sp._PAFTOL	1893208	247073	13.0505	352	320	312	299	252	174	5	18	188250	562201
Ophiorrhiza_winkleri_PAFTOL	852822	167398	19.6287	353	314	303	271	198	106	4	0	149319	322068
Paederia_thouarsiana_PAFTOL	2389358	209387	8.76332	347	313	313	302	250	190	10	2	197712	640264
Palicourea_nitidella_PAFTOL	954302	112132	11.7502	346	288	285	264	200	126	4	3	156603	419767
Perama_dichotoma_PAFTOL	1938690	87158	4.49572	331	239	234	221	194	144	5	0	148671	379502
Plocama_calabrica_PAFTOL	1461868	197907	13.538	346	300	298	290	242	188	7	2	189180	617999
Prismatomeris_sp._PAFTOL	1217278	117081	9.61826	349	288	284	271	220	153	6	1	173715	546190
Psychotria_pandurata_PAFTOL	778050	62143	7.98702	340	262	257	238	168	108	4	2	135624	390789
Razafimandimbisonia_minor_PAFTOL	1912346	336986	17.6216	350	315	311	301	269	214	25	22	222915	730194
Rubia_peregrina_PAFTOL	3603986	104640	2.90345	333	242	239	211	158	98	4	6	121617	302008
Saldinia_aegialodes_PAFTOL	1649566	224524	13.6111	346	307	303	297	260	197	10	2	201537	640485
Spermacoce_sp._PAFTOL	1180896	178475	15.1135	338	298	295	280	239	174	9	3	183642	566424
Theligonum_cynocrambe_PAFTOL	5963764	5565011	93.3137	329	251	246	230	174	114	5	1	134754	364070
Urophyllum_cyphandrum_PAFTOL	1574358	342412	21.7493	350	318	312	295	242	178	10	18	196623	637142
