# Supplementary material for: Target capture data resolve recalcitrant relationships in the coffee family (Rubioideae, Rubiaceae)
Source: Front Plant Sci. 2022 Sep 8;13:967456. doi: 10.3389/fpls.2022.967456 (PMC9493367; doi:10.3389/fpls.2022.967456)
Supplement: Supplementary file 3 [file Table_3.xlsx]

## Sheet: AMAS_SC&CDS_final
Supplementary Table 3. Alignment statistics for each CDS and supercontig alignment. Alignments included in the paralog-filtered datasets are highlighted in grey.
Alignment name	# of taxa	Alignment length	Total matrix cells	Undetermined characters	Missing percent	# variable sites	Proportion variable sites	Parsimony informative sites	Proportion parsimony informative	AT content	GC content	A	C	G	T	K	M	R	Y	S	W	B	V	H	D	X	N	O	-	?
4471_supercontig.fasta	124	4356	540144	291833	54.029	4175	0.958	3685	0.846	0.644	0.356	66867	40929	47495	93020	0	0	0	0	0	0	0	0	0	0	0	0	0	291833	0
4527_supercontig.fasta	122	3129	381738	118430	31.024	2708	0.865	2396	0.766	0.583	0.417	69194	43783	65544	84787	0	0	0	0	0	0	0	0	0	0	0	0	0	118430	0
4691_supercontig.fasta	121	2077	251317	123774	49.25	1986	0.956	1827	0.88	0.591	0.409	33550	24410	27325	42258	0	0	0	0	0	0	0	0	0	0	0	0	0	123774	0
4724_supercontig.fasta	124	1807	224068	62662	27.966	1636	0.905	1472	0.815	0.607	0.393	44917	27685	35671	53133	0	0	0	0	0	0	0	0	0	0	0	0	0	62662	0
4744_supercontig.fasta	103	1593	164079	67170	40.938	1393	0.874	1105	0.694	0.632	0.368	25612	16252	19376	35669	0	0	0	0	0	0	0	0	0	0	0	0	0	67170	0
4757_supercontig.fasta	124	1833	227292	98935	43.528	1641	0.895	1484	0.81	0.6	0.4	34188	23081	28086	43002	0	0	0	0	0	0	0	0	0	0	0	0	0	98935	0
4793_supercontig.fasta	124	4878	604872	234434	38.758	4686	0.961	4186	0.858	0.606	0.394	95318	63699	82098	129323	0	0	0	0	0	0	0	0	0	0	0	0	0	234434	0
4796_supercontig.fasta	121	3780	457380	209729	45.854	3667	0.97	3291	0.871	0.621	0.379	63879	43022	50666	90084	0	0	0	0	0	0	0	0	0	0	0	0	0	209729	0
4802_supercontig.fasta	121	4634	560714	226175	40.337	4391	0.948	3893	0.84	0.631	0.369	93799	54580	68975	117185	0	0	0	0	0	0	0	0	0	0	0	0	0	226175	0
4806_supercontig.fasta	121	3102	375342	170640	45.463	3034	0.978	2839	0.915	0.629	0.371	57819	32445	43065	71373	0	0	0	0	0	0	0	0	0	0	0	0	0	170640	0
4848_supercontig.fasta	122	4372	533384	186497	34.965	3915	0.895	3450	0.789	0.586	0.414	94021	62851	80567	109448	0	0	0	0	0	0	0	0	0	0	0	0	0	186497	0
4889_supercontig.fasta	114	2580	294120	125760	42.758	2448	0.949	2264	0.878	0.648	0.352	47664	24579	34510	61607	0	0	0	0	0	0	0	0	0	0	0	0	0	125760	0
4890_supercontig.fasta	121	2719	328999	157643	47.916	2641	0.971	2444	0.899	0.613	0.387	43025	30145	35810	62376	0	0	0	0	0	0	0	0	0	0	0	0	0	157643	0
4893_supercontig.fasta	124	3875	480500	208671	43.428	3581	0.924	3090	0.797	0.639	0.361	78337	42971	54981	95540	0	0	0	0	0	0	0	0	0	0	0	0	0	208671	0
4932_supercontig.fasta	123	2595	319185	87238	27.331	2251	0.867	2026	0.781	0.618	0.382	65063	38976	49290	78618	0	0	0	0	0	0	0	0	0	0	0	0	0	87238	0
4942_supercontig.fasta	122	3775	460550	212294	46.096	3575	0.947	3252	0.861	0.594	0.406	61764	46411	52995	87086	0	0	0	0	0	0	0	0	0	0	0	0	0	212294	0
4951_supercontig.fasta	118	1767	208506	86669	41.567	1507	0.853	1301	0.736	0.593	0.407	33879	22659	26605	38694	0	0	0	0	0	0	0	0	0	0	0	0	0	86669	0
4954_supercontig.fasta	124	3281	406844	156664	38.507	3121	0.951	2692	0.82	0.615	0.385	70833	37912	58367	83068	0	0	0	0	0	0	0	0	0	0	0	0	0	156664	0
4989_supercontig.fasta	122	2180	265960	88098	33.125	1969	0.903	1755	0.805	0.614	0.386	50175	29942	38728	59017	0	0	0	0	0	0	0	0	0	0	0	0	0	88098	0
4992_supercontig.fasta	124	6050	750200	296647	39.542	5577	0.922	4816	0.796	0.629	0.371	129322	76523	91385	156323	0	0	0	0	0	0	0	0	0	0	0	0	0	296647	0
5018_supercontig.fasta	123	3426	421398	159559	37.864	3205	0.935	2846	0.831	0.614	0.386	70522	46686	54163	90468	0	0	0	0	0	0	0	0	0	0	0	0	0	159559	0
5032_supercontig.fasta	121	4082	493922	236037	47.788	3927	0.962	3531	0.865	0.634	0.366	77719	39990	54223	85953	0	0	0	0	0	0	0	0	0	0	0	0	0	236037	0
5034_supercontig.fasta	122	1985	242170	86032	35.525	1862	0.938	1689	0.851	0.607	0.393	43693	30698	30272	51475	0	0	0	0	0	0	0	0	0	0	0	0	0	86032	0
5038_supercontig.fasta	123	3620	445260	240806	54.082	3495	0.965	3119	0.862	0.632	0.368	51569	34687	40172	78026	0	0	0	0	0	0	0	0	0	0	0	0	0	240806	0
5064_supercontig.fasta	87	1042	90654	37471	41.334	928	0.891	847	0.813	0.596	0.404	14141	11012	10399	17631	0	0	0	0	0	0	0	0	0	0	0	0	0	37471	0
5090_supercontig.fasta	117	2292	268164	115636	43.121	2140	0.934	1901	0.829	0.578	0.422	40145	31128	33011	48244	0	0	0	0	0	0	0	0	0	0	0	0	0	115636	0
5104_supercontig.fasta	97	1590	154230	80508	52.2	1516	0.953	1384	0.87	0.613	0.387	19397	15197	13400	25728	0	0	0	0	0	0	0	0	0	0	0	0	0	80508	0
5116_supercontig.fasta	123	3804	467892	195371	41.756	3547	0.932	3186	0.838	0.611	0.389	70098	46521	59668	96234	0	0	0	0	0	0	0	0	0	0	0	0	0	195371	0
5123_supercontig.fasta	122	4764	581208	270071	46.467	4564	0.958	4154	0.872	0.63	0.37	87877	47106	67738	108416	0	0	0	0	0	0	0	0	0	0	0	0	0	270071	0
5131_supercontig.fasta	121	2869	347149	137655	39.653	2656	0.926	2355	0.821	0.596	0.404	54432	35880	48471	70711	0	0	0	0	0	0	0	0	0	0	0	0	0	137655	0
5138_supercontig.fasta	120	2204	264480	99932	37.784	2026	0.919	1725	0.783	0.611	0.389	45826	29918	33870	54934	0	0	0	0	0	0	0	0	0	0	0	0	0	99932	0
5162_supercontig.fasta	122	3189	389058	150922	38.792	2989	0.937	2707	0.849	0.575	0.425	64991	51281	49838	72026	0	0	0	0	0	0	0	0	0	0	0	0	0	150922	0
5163_supercontig.fasta	121	5079	614559	235803	38.369	4719	0.929	4093	0.806	0.628	0.372	106485	64558	76095	131618	0	0	0	0	0	0	0	0	0	0	0	0	0	235803	0
5168_supercontig.fasta	120	2736	328320	132135	40.246	2588	0.946	2391	0.874	0.611	0.389	52162	32244	43882	67897	0	0	0	0	0	0	0	0	0	0	0	0	0	132135	0
5177_supercontig.fasta	120	2670	320400	138942	43.365	2597	0.973	2363	0.885	0.576	0.424	45456	35451	40230	60321	0	0	0	0	0	0	0	0	0	0	0	0	0	138942	0
5188_supercontig.fasta	121	2543	307703	142514	46.315	2377	0.935	2202	0.866	0.609	0.391	47883	25752	38662	52892	0	0	0	0	0	0	0	0	0	0	0	0	0	142514	0
5200_supercontig.fasta	123	3210	394830	175687	44.497	3036	0.946	2801	0.873	0.604	0.396	59009	42663	43755	73716	0	0	0	0	0	0	0	0	0	0	0	0	0	175687	0
5206_supercontig.fasta	123	2993	368139	163744	44.479	2840	0.949	2593	0.866	0.623	0.377	56923	36739	40128	70605	0	0	0	0	0	0	0	0	0	0	0	0	0	163744	0
5220_supercontig.fasta	116	2000	232000	105072	45.29	1923	0.962	1778	0.889	0.626	0.374	36279	22489	24735	43425	0	0	0	0	0	0	0	0	0	0	0	0	0	105072	0
5257_supercontig.fasta	123	3604	443292	205330	46.319	3489	0.968	3177	0.882	0.617	0.383	69748	40793	50023	77398	0	0	0	0	0	0	0	0	0	0	0	0	0	205330	0
5260_supercontig.fasta	87	1795	156165	94222	60.335	1735	0.967	1540	0.858	0.625	0.375	16926	11487	11746	21784	0	0	0	0	0	0	0	0	0	0	0	0	0	94222	0
5264_supercontig.fasta	123	4075	501225	187202	37.349	3635	0.892	3153	0.774	0.603	0.397	90654	55180	69334	98855	0	0	0	0	0	0	0	0	0	0	0	0	0	187202	0
5271_supercontig.fasta	121	2114	255794	110973	43.384	1989	0.941	1809	0.856	0.62	0.38	40231	23825	31242	49523	0	0	0	0	0	0	0	0	0	0	0	0	0	110973	0
5273_supercontig.fasta	119	3979	473501	207622	43.848	3846	0.967	3363	0.845	0.607	0.393	73821	44741	59022	88295	0	0	0	0	0	0	0	0	0	0	0	0	0	207622	0
5280_supercontig.fasta	124	3787	469588	160292	34.135	3362	0.888	2985	0.788	0.616	0.384	83555	57102	61552	107087	0	0	0	0	0	0	0	0	0	0	0	0	0	160292	0
5296_supercontig.fasta	121	3060	370260	141263	38.152	2878	0.941	2535	0.828	0.618	0.382	61705	38665	48674	79953	0	0	0	0	0	0	0	0	0	0	0	0	0	141263	0
5299_supercontig.fasta	117	3036	355212	169153	47.62	2869	0.945	2489	0.82	0.638	0.362	49633	30636	36274	69516	0	0	0	0	0	0	0	0	0	0	0	0	0	169153	0
5304_supercontig.fasta	122	3119	380518	174187	45.776	2969	0.952	2736	0.877	0.635	0.365	57100	33732	41543	73956	0	0	0	0	0	0	0	0	0	0	0	0	0	174187	0
5318_supercontig.fasta	123	3586	441078	172287	39.06	3429	0.956	3092	0.862	0.633	0.367	72510	46096	52355	97830	0	0	0	0	0	0	0	0	0	0	0	0	0	172287	0
5326_supercontig.fasta	124	3289	407836	153710	37.689	3072	0.934	2576	0.783	0.574	0.426	65088	47512	60497	81029	0	0	0	0	0	0	0	0	0	0	0	0	0	153710	0
5328_supercontig.fasta	117	1678	196326	71988	36.668	1530	0.912	1383	0.824	0.583	0.417	35157	19056	32607	37518	0	0	0	0	0	0	0	0	0	0	0	0	0	71988	0
5333_supercontig.fasta	123	3899	479577	145548	30.349	3398	0.872	2861	0.734	0.591	0.409	93973	57879	78199	103978	0	0	0	0	0	0	0	0	0	0	0	0	0	145548	0
5335_supercontig.fasta	124	5257	651868	274399	42.094	4964	0.944	4419	0.841	0.631	0.369	100490	64993	74496	137490	0	0	0	0	0	0	0	0	0	0	0	0	0	274399	0
5339_supercontig.fasta	113	4170	471210	259950	55.166	3940	0.945	3248	0.779	0.633	0.367	58655	34548	43363	74694	0	0	0	0	0	0	0	0	0	0	0	0	0	259950	0
5343_supercontig.fasta	123	1499	184377	55767	30.246	1359	0.907	1172	0.782	0.604	0.396	36029	21488	29252	41841	0	0	0	0	0	0	0	0	0	0	0	0	0	55767	0
5347_supercontig.fasta	118	1424	168032	83219	49.526	1353	0.95	1238	0.869	0.627	0.373	22461	12903	18483	30966	0	0	0	0	0	0	0	0	0	0	0	0	0	83219	0
5348_supercontig.fasta	103	2494	256882	140336	54.631	2397	0.961	2053	0.823	0.623	0.377	33108	20100	23495	39843	0	0	0	0	0	0	0	0	0	0	0	0	0	140336	0
5354_supercontig.fasta	96	2107	202272	116278	57.486	2017	0.957	1735	0.823	0.632	0.368	21878	14501	16910	32705	0	0	0	0	0	0	0	0	0	0	0	0	0	116278	0
5355_supercontig.fasta	124	1348	167152	58306	34.882	1187	0.881	1034	0.767	0.607	0.393	32939	17341	25205	33361	0	0	0	0	0	0	0	0	0	0	0	0	0	58306	0
5357_supercontig.fasta	121	1537	185977	92691	49.84	1464	0.953	1341	0.872	0.615	0.385	24516	16354	19615	32801	0	0	0	0	0	0	0	0	0	0	0	0	0	92691	0
5366_supercontig.fasta	124	5735	711140	307993	43.31	5528	0.964	5082	0.886	0.623	0.377	109027	67292	84042	142786	0	0	0	0	0	0	0	0	0	0	0	0	0	307993	0
5398_supercontig.fasta	124	6896	855104	282114	32.992	6175	0.895	5637	0.817	0.635	0.365	167310	96486	112433	196761	0	0	0	0	0	0	0	0	0	0	0	0	0	282114	0
5404_supercontig.fasta	119	3970	472430	189819	40.179	3671	0.925	3139	0.791	0.626	0.374	75091	50256	55549	101715	0	0	0	0	0	0	0	0	0	0	0	0	0	189819	0
5406_supercontig.fasta	124	5848	725152	244640	33.736	5260	0.899	4696	0.803	0.619	0.381	124052	81232	101347	173881	0	0	0	0	0	0	0	0	0	0	0	0	0	244640	0
5421_supercontig.fasta	124	5175	641700	258378	40.265	4929	0.952	4444	0.859	0.621	0.379	104091	64859	80695	133677	0	0	0	0	0	0	0	0	0	0	0	0	0	258378	0
5422_supercontig.fasta	121	1914	231594	64533	27.865	1717	0.897	1550	0.81	0.616	0.384	47891	29065	34953	55152	0	0	0	0	0	0	0	0	0	0	0	0	0	64533	0
5426_supercontig.fasta	124	4657	577468	186411	32.281	4160	0.893	3676	0.789	0.607	0.393	104263	69011	84458	133325	0	0	0	0	0	0	0	0	0	0	0	0	0	186411	0
5427_supercontig.fasta	124	5297	656828	275918	42.008	5084	0.96	4676	0.883	0.644	0.356	112692	62590	72779	132849	0	0	0	0	0	0	0	0	0	0	0	0	0	275918	0
5428_supercontig.fasta	122	1298	158356	42415	26.785	1033	0.796	886	0.683	0.552	0.448	29644	24341	27504	34452	0	0	0	0	0	0	0	0	0	0	0	0	0	42415	0
5430_supercontig.fasta	123	2767	340341	149286	43.864	2633	0.952	2352	0.85	0.637	0.363	57302	30998	38415	64340	0	0	0	0	0	0	0	0	0	0	0	0	0	149286	0
5434_supercontig.fasta	110	2358	259380	113946	43.93	2263	0.96	1952	0.828	0.596	0.404	39255	25746	33252	47181	0	0	0	0	0	0	0	0	0	0	0	0	0	113946	0
5449_supercontig.fasta	123	3440	423120	114027	26.949	3139	0.912	2865	0.833	0.594	0.406	86481	54199	71099	97314	0	0	0	0	0	0	0	0	0	0	0	0	0	114027	0
5454_supercontig.fasta	124	4010	497240	179991	36.198	3611	0.9	3277	0.817	0.601	0.399	88327	55687	70930	102305	0	0	0	0	0	0	0	0	0	0	0	0	0	179991	0
5460_supercontig.fasta	119	1800	214200	73573	34.348	1635	0.908	1432	0.796	0.625	0.375	40282	23118	29566	47661	0	0	0	0	0	0	0	0	0	0	0	0	0	73573	0
5463_supercontig.fasta	120	2717	326040	155370	47.654	2552	0.939	2355	0.867	0.638	0.362	47683	26308	35396	61283	0	0	0	0	0	0	0	0	0	0	0	0	0	155370	0
5464_supercontig.fasta	121	3878	469238	212952	45.383	3716	0.958	3342	0.862	0.621	0.379	70413	42992	53971	88910	0	0	0	0	0	0	0	0	0	0	0	0	0	212952	0
5469_supercontig.fasta	122	2394	292068	89286	30.57	2235	0.934	2045	0.854	0.621	0.379	54743	35423	41304	71312	0	0	0	0	0	0	0	0	0	0	0	0	0	89286	0
5477_supercontig.fasta	114	1979	225606	112304	49.779	1873	0.946	1656	0.837	0.624	0.376	30544	19692	22705	40361	0	0	0	0	0	0	0	0	0	0	0	0	0	112304	0
5489_supercontig.fasta	120	5105	612600	341140	55.687	4950	0.97	4377	0.857	0.636	0.364	73853	42091	56578	98938	0	0	0	0	0	0	0	0	0	0	0	0	0	341140	0
5502_supercontig.fasta	124	5523	684852	292782	42.751	5287	0.957	4800	0.869	0.623	0.377	106554	68506	78324	138686	0	0	0	0	0	0	0	0	0	0	0	0	0	292782	0
5513_supercontig.fasta	120	3647	437640	211932	48.426	3506	0.961	3206	0.879	0.61	0.39	62478	42447	45062	75721	0	0	0	0	0	0	0	0	0	0	0	0	0	211932	0
5528_supercontig.fasta	123	6666	819918	340230	41.496	6319	0.948	5691	0.854	0.635	0.365	134933	78486	96226	170043	0	0	0	0	0	0	0	0	0	0	0	0	0	340230	0
5531_supercontig.fasta	122	2414	294508	150781	51.198	2333	0.966	2147	0.889	0.619	0.381	40697	24199	30394	48437	0	0	0	0	0	0	0	0	0	0	0	0	0	150781	0
5536_supercontig.fasta	116	2067	239772	98042	40.89	1921	0.929	1737	0.84	0.629	0.371	41128	24079	28365	48158	0	0	0	0	0	0	0	0	0	0	0	0	0	98042	0
5551_supercontig.fasta	115	3558	409170	190398	46.533	3351	0.942	2899	0.815	0.634	0.366	61240	36969	43155	77408	0	0	0	0	0	0	0	0	0	0	0	0	0	190398	0
5554_supercontig.fasta	122	4854	592188	264675	44.694	4676	0.963	4368	0.9	0.615	0.385	96179	55625	69799	105910	0	0	0	0	0	0	0	0	0	0	0	0	0	264675	0
5562_supercontig.fasta	114	2231	254334	130504	51.312	2175	0.975	1981	0.888	0.609	0.391	32126	22491	25849	43364	0	0	0	0	0	0	0	0	0	0	0	0	0	130504	0
5578_supercontig.fasta	112	1029	115248	48647	42.211	972	0.945	910	0.884	0.614	0.386	18947	11550	13756	22348	0	0	0	0	0	0	0	0	0	0	0	0	0	48647	0
5594_supercontig.fasta	123	1610	198030	67270	33.97	1409	0.875	1283	0.797	0.567	0.433	37616	24855	31596	36693	0	0	0	0	0	0	0	0	0	0	0	0	0	67270	0
5596_supercontig.fasta	124	6482	803768	294903	36.69	5437	0.839	4386	0.677	0.594	0.406	132462	93905	111982	170516	0	0	0	0	0	0	0	0	0	0	0	0	0	294903	0
5599_supercontig.fasta	124	6736	835264	310436	37.166	6227	0.924	5509	0.818	0.614	0.386	142036	92921	108829	181042	0	0	0	0	0	0	0	0	0	0	0	0	0	310436	0
5614_supercontig.fasta	124	5523	684852	188670	27.549	5027	0.91	4427	0.802	0.602	0.398	134045	85578	111917	164642	0	0	0	0	0	0	0	0	0	0	0	0	0	188670	0
5620_supercontig.fasta	124	1895	234980	51524	21.927	1581	0.834	1386	0.731	0.575	0.425	52802	27364	50387	52903	0	0	0	0	0	0	0	0	0	0	0	0	0	51524	0
5634_supercontig.fasta	121	4620	559020	281055	50.276	4450	0.963	4025	0.871	0.621	0.379	73779	49579	55174	99433	0	0	0	0	0	0	0	0	0	0	0	0	0	281055	0
5639_supercontig.fasta	123	3633	446859	182489	40.838	3384	0.931	3032	0.835	0.612	0.388	71986	45658	56501	90225	0	0	0	0	0	0	0	0	0	0	0	0	0	182489	0
5642_supercontig.fasta	69	1824	125856	73270	58.217	1631	0.894	1242	0.681	0.648	0.352	15144	9404	9226	18812	0	0	0	0	0	0	0	0	0	0	0	0	0	73270	0
5644_supercontig.fasta	122	3208	391376	181202	46.299	3078	0.959	2706	0.844	0.613	0.387	52619	38932	42506	76117	0	0	0	0	0	0	0	0	0	0	0	0	0	181202	0
5656_supercontig.fasta	109	1619	176471	93434	52.946	1487	0.918	1296	0.8	0.624	0.376	21283	14511	17015	30228	0	0	0	0	0	0	0	0	0	0	0	0	0	93434	0
5660_supercontig.fasta	121	1416	171336	47152	27.52	1200	0.847	984	0.695	0.553	0.447	33077	26079	29278	35750	0	0	0	0	0	0	0	0	0	0	0	0	0	47152	0
5664_supercontig.fasta	122	3583	437126	135048	30.895	3340	0.932	3064	0.855	0.619	0.381	82008	48285	66476	105309	0	0	0	0	0	0	0	0	0	0	0	0	0	135048	0
5670_supercontig.fasta	119	3150	374850	130870	34.913	2821	0.896	2483	0.788	0.618	0.382	71165	39480	53311	80024	0	0	0	0	0	0	0	0	0	0	0	0	0	130870	0
5699_supercontig.fasta	120	4169	500280	255446	51.061	4068	0.976	3651	0.876	0.65	0.35	67896	39193	46249	91496	0	0	0	0	0	0	0	0	0	0	0	0	0	255446	0
5702_supercontig.fasta	124	3767	467108	199694	42.751	3597	0.955	3292	0.874	0.634	0.366	76249	41702	55928	93535	0	0	0	0	0	0	0	0	0	0	0	0	0	199694	0
5703_supercontig.fasta	106	3628	384568	224604	58.404	3441	0.948	2917	0.804	0.62	0.38	38684	31802	28814	60664	0	0	0	0	0	0	0	0	0	0	0	0	0	224604	0
5716_supercontig.fasta	121	5698	689458	307307	44.572	5512	0.967	5001	0.878	0.615	0.385	103415	64106	82374	132256	0	0	0	0	0	0	0	0	0	0	0	0	0	307307	0
5721_supercontig.fasta	121	2932	354772	117944	33.245	2704	0.922	2448	0.835	0.613	0.387	63918	39667	51930	81313	0	0	0	0	0	0	0	0	0	0	0	0	0	117944	0
5733_supercontig.fasta	115	2726	313490	170811	54.487	2586	0.949	2313	0.848	0.626	0.374	39066	25462	27965	50186	0	0	0	0	0	0	0	0	0	0	0	0	0	170811	0
5744_supercontig.fasta	121	2064	249744	126527	50.663	1954	0.947	1774	0.859	0.594	0.406	34093	23020	26535	39569	0	0	0	0	0	0	0	0	0	0	0	0	0	126527	0
5770_supercontig.fasta	121	4304	520784	198667	38.148	3984	0.926	3482	0.809	0.624	0.376	95532	54491	66116	105978	0	0	0	0	0	0	0	0	0	0	0	0	0	198667	0
5772_supercontig.fasta	121	1766	213686	78208	36.599	1674	0.948	1530	0.866	0.585	0.415	38296	25045	30811	41326	0	0	0	0	0	0	0	0	0	0	0	0	0	78208	0
5791_supercontig.fasta	118	4853	572654	304983	53.258	4612	0.95	4108	0.846	0.632	0.368	73021	46501	51506	96643	0	0	0	0	0	0	0	0	0	0	0	0	0	304983	0
5802_supercontig.fasta	124	1142	141608	44566	31.471	1050	0.919	896	0.785	0.595	0.405	26201	19616	19693	31532	0	0	0	0	0	0	0	0	0	0	0	0	0	44566	0
5815_supercontig.fasta	118	2986	352348	156217	44.336	2733	0.915	2465	0.826	0.597	0.403	49637	35481	43077	67936	0	0	0	0	0	0	0	0	0	0	0	0	0	156217	0
5816_supercontig.fasta	115	4580	526700	274506	52.118	4275	0.933	3740	0.817	0.619	0.381	63908	45354	50478	92454	0	0	0	0	0	0	0	0	0	0	0	0	0	274506	0
5821_supercontig.fasta	119	2951	351169	190688	54.301	2813	0.953	2443	0.828	0.632	0.368	42996	26440	32556	58489	0	0	0	0	0	0	0	0	0	0	0	0	0	190688	0
5822_supercontig.fasta	116	2110	244760	109722	44.828	1993	0.945	1781	0.844	0.589	0.411	37623	24879	29692	42844	0	0	0	0	0	0	0	0	0	0	0	0	0	109722	0
5840_supercontig.fasta	124	3538	438712	205264	46.788	3233	0.914	2980	0.842	0.603	0.397	64864	44003	48131	76450	0	0	0	0	0	0	0	0	0	0	0	0	0	205264	0
5841_supercontig.fasta	116	4250	493000	246945	50.09	4052	0.953	3626	0.853	0.622	0.378	64478	44217	48636	88724	0	0	0	0	0	0	0	0	0	0	0	0	0	246945	0
5842_supercontig.fasta	124	3748	464752	217125	46.718	3519	0.939	3069	0.819	0.617	0.383	63016	43510	51263	89838	0	0	0	0	0	0	0	0	0	0	0	0	0	217125	0
5843_supercontig.fasta	119	1958	233002	102420	43.957	1904	0.972	1754	0.896	0.619	0.381	33655	23484	26281	47162	0	0	0	0	0	0	0	0	0	0	0	0	0	102420	0
5849_supercontig.fasta	111	2148	238428	105144	44.099	2029	0.945	1797	0.837	0.628	0.372	36218	22409	27042	47615	0	0	0	0	0	0	0	0	0	0	0	0	0	105144	0
5853_supercontig.fasta	122	1674	204228	48665	23.829	1524	0.91	1365	0.815	0.623	0.377	48077	23010	35496	48980	0	0	0	0	0	0	0	0	0	0	0	0	0	48665	0
5857_supercontig.fasta	121	2193	265353	106305	40.062	2109	0.962	1862	0.849	0.581	0.419	43366	31415	35230	49037	0	0	0	0	0	0	0	0	0	0	0	0	0	106305	0
5858_supercontig.fasta	123	2998	368754	190991	51.794	2813	0.938	2519	0.84	0.597	0.403	50885	32300	39068	55510	0	0	0	0	0	0	0	0	0	0	0	0	0	190991	0
5859_supercontig.fasta	121	1758	212718	83653	39.326	1608	0.915	1408	0.801	0.552	0.448	30639	28624	28965	40837	0	0	0	0	0	0	0	0	0	0	0	0	0	83653	0
5865_supercontig.fasta	124	4944	613056	258577	42.178	4750	0.961	4188	0.847	0.622	0.378	95964	59660	73718	125137	0	0	0	0	0	0	0	0	0	0	0	0	0	258577	0
5866_supercontig.fasta	123	3233	397659	183063	46.035	3050	0.943	2601	0.805	0.626	0.374	57784	35069	44912	76831	0	0	0	0	0	0	0	0	0	0	0	0	0	183063	0
5870_supercontig.fasta	121	3380	408980	190564	46.595	3228	0.955	2915	0.862	0.648	0.352	57009	36430	40201	84776	0	0	0	0	0	0	0	0	0	0	0	0	0	190564	0
5893_supercontig.fasta	101	2127	214827	101117	47.069	1977	0.929	1683	0.791	0.586	0.414	30070	25617	21033	36990	0	0	0	0	0	0	0	0	0	0	0	0	0	101117	0
5894_supercontig.fasta	101	2055	207555	114484	55.158	2010	0.978	1828	0.89	0.651	0.349	27862	14625	17811	32773	0	0	0	0	0	0	0	0	0	0	0	0	0	114484	0
5899_supercontig.fasta	120	5886	706320	354296	50.161	5678	0.965	5117	0.869	0.624	0.376	94953	60968	71614	124489	0	0	0	0	0	0	0	0	0	0	0	0	0	354296	0
5910_supercontig.fasta	123	2235	274905	98354	35.777	2063	0.923	1829	0.818	0.571	0.429	48488	33225	42129	52709	0	0	0	0	0	0	0	0	0	0	0	0	0	98354	0
5913_supercontig.fasta	124	3891	482484	187062	38.771	3686	0.947	3300	0.848	0.606	0.394	85893	52456	63468	93605	0	0	0	0	0	0	0	0	0	0	0	0	0	187062	0
5918_supercontig.fasta	118	3157	372526	182935	49.107	3073	0.973	2791	0.884	0.618	0.382	50474	34230	37484	67403	0	0	0	0	0	0	0	0	0	0	0	0	0	182935	0
5919_supercontig.fasta	122	1286	156892	53520	34.113	1137	0.884	1039	0.808	0.593	0.407	29810	17202	24652	31708	0	0	0	0	0	0	0	0	0	0	0	0	0	53520	0
5921_supercontig.fasta	123	8802	1082646	299689	27.681	8223	0.934	7226	0.821	0.624	0.376	239333	126574	167127	249923	0	0	0	0	0	0	0	0	0	0	0	0	0	299689	0
5922_supercontig.fasta	124	7221	895404	368169	41.118	6844	0.948	6323	0.876	0.629	0.371	149295	87411	107359	183170	0	0	0	0	0	0	0	0	0	0	0	0	0	368169	0
5926_supercontig.fasta	122	3015	367830	164646	44.761	2807	0.931	2509	0.832	0.63	0.37	54028	35205	39887	74064	0	0	0	0	0	0	0	0	0	0	0	0	0	164646	0
5933_supercontig.fasta	122	2935	358070	144294	40.298	2698	0.919	2385	0.813	0.578	0.422	58909	43590	46424	64853	0	0	0	0	0	0	0	0	0	0	0	0	0	144294	0
5936_supercontig.fasta	117	2374	277758	134239	48.329	2159	0.909	1865	0.786	0.612	0.388	36580	23945	31926	51068	0	0	0	0	0	0	0	0	0	0	0	0	0	134239	0
5940_supercontig.fasta	124	1665	206460	63472	30.743	1456	0.874	1277	0.767	0.63	0.37	36014	27542	25449	53983	0	0	0	0	0	0	0	0	0	0	0	0	0	63472	0
5941_supercontig.fasta	105	2514	263970	136022	51.529	2455	0.977	2181	0.868	0.631	0.369	34813	20826	26185	46124	0	0	0	0	0	0	0	0	0	0	0	0	0	136022	0
5942_supercontig.fasta	115	1528	175720	61447	34.969	1301	0.851	1145	0.749	0.538	0.462	30492	26817	26373	30591	0	0	0	0	0	0	0	0	0	0	0	0	0	61447	0
5943_supercontig.fasta	123	5376	661248	254728	38.522	4975	0.925	4347	0.809	0.622	0.378	107499	68723	85015	145283	0	0	0	0	0	0	0	0	0	0	0	0	0	254728	0
5944_supercontig.fasta	124	3277	406348	196960	48.471	3086	0.942	2685	0.819	0.616	0.384	57662	37923	42312	71491	0	0	0	0	0	0	0	0	0	0	0	0	0	196960	0
5945_supercontig.fasta	117	3390	396630	180705	45.56	3114	0.919	2831	0.835	0.617	0.383	57022	36949	45576	76378	0	0	0	0	0	0	0	0	0	0	0	0	0	180705	0
5949_supercontig.fasta	123	2448	301104	121805	40.453	2287	0.934	2098	0.857	0.621	0.379	49039	31654	36031	62575	0	0	0	0	0	0	0	0	0	0	0	0	0	121805	0
5950_supercontig.fasta	122	3480	424560	174930	41.203	3229	0.928	2908	0.836	0.632	0.368	67416	44311	46892	91011	0	0	0	0	0	0	0	0	0	0	0	0	0	174930	0
5958_supercontig.fasta	121	1319	159599	65145	40.818	1163	0.882	1089	0.826	0.592	0.408	26333	17757	20403	29961	0	0	0	0	0	0	0	0	0	0	0	0	0	65145	0
5960_supercontig.fasta	123	3499	430377	205131	47.663	3252	0.929	2891	0.826	0.607	0.393	60230	38663	49498	76855	0	0	0	0	0	0	0	0	0	0	0	0	0	205131	0
5968_supercontig.fasta	120	2653	318360	187175	58.794	2489	0.938	2151	0.811	0.621	0.379	34939	22151	27471	46624	0	0	0	0	0	0	0	0	0	0	0	0	0	187175	0
5974_supercontig.fasta	120	2670	320400	134649	42.025	2505	0.938	2200	0.824	0.632	0.368	53751	32949	35331	63720	0	0	0	0	0	0	0	0	0	0	0	0	0	134649	0
5977_supercontig.fasta	118	1822	214996	84526	39.315	1743	0.957	1583	0.869	0.617	0.383	34975	23914	25863	45718	0	0	0	0	0	0	0	0	0	0	0	0	0	84526	0
5980_supercontig.fasta	110	3385	372350	184690	49.601	3287	0.971	2964	0.876	0.636	0.364	52972	31319	36792	66577	0	0	0	0	0	0	0	0	0	0	0	0	0	184690	0
5981_supercontig.fasta	123	3281	403563	142305	35.262	3113	0.949	2838	0.865	0.615	0.385	72223	47407	53002	88626	0	0	0	0	0	0	0	0	0	0	0	0	0	142305	0
5990_supercontig.fasta	113	1087	122831	44836	36.502	1039	0.956	933	0.858	0.581	0.419	23506	14976	17486	22027	0	0	0	0	0	0	0	0	0	0	0	0	0	44836	0
6000_supercontig.fasta	119	2697	320943	129218	40.262	2433	0.902	2144	0.795	0.629	0.371	52452	32012	38859	68402	0	0	0	0	0	0	0	0	0	0	0	0	0	129218	0
6003_supercontig.fasta	123	1232	151536	64769	42.742	1117	0.907	1054	0.856	0.624	0.376	26566	14506	17973	27722	0	0	0	0	0	0	0	0	0	0	0	0	0	64769	0
6004_supercontig.fasta	122	3073	374906	160042	42.689	2940	0.957	2764	0.899	0.605	0.395	61173	36903	47527	69261	0	0	0	0	0	0	0	0	0	0	0	0	0	160042	0
6016_supercontig.fasta	124	4253	527372	236210	44.79	3900	0.917	3513	0.826	0.6	0.4	66620	52201	64097	108244	0	0	0	0	0	0	0	0	0	0	0	0	0	236210	0
6026_supercontig.fasta	124	3893	482732	251812	52.164	3661	0.94	3360	0.863	0.613	0.387	65999	41546	47555	75820	0	0	0	0	0	0	0	0	0	0	0	0	0	251812	0
6029_supercontig.fasta	118	4424	522032	252305	48.331	4294	0.971	3932	0.889	0.636	0.364	72687	44930	52825	99285	0	0	0	0	0	0	0	0	0	0	0	0	0	252305	0
6034_supercontig.fasta	124	2025	251100	89519	35.651	1915	0.946	1747	0.863	0.63	0.37	44401	27465	32104	57611	0	0	0	0	0	0	0	0	0	0	0	0	0	89519	0
6036_supercontig.fasta	123	4155	511065	176311	34.499	3812	0.917	3341	0.804	0.609	0.391	96608	56083	74728	107335	0	0	0	0	0	0	0	0	0	0	0	0	0	176311	0
6038_supercontig.fasta	124	4781	592844	227576	38.387	4600	0.962	4203	0.879	0.617	0.383	96651	63895	75857	128865	0	0	0	0	0	0	0	0	0	0	0	0	0	227576	0
6041_supercontig.fasta	123	7557	929511	453582	48.798	7106	0.94	6387	0.845	0.632	0.368	127115	81167	94217	173430	0	0	0	0	0	0	0	0	0	0	0	0	0	453582	0
6048_supercontig.fasta	114	2523	287622	157793	54.861	2457	0.974	2264	0.897	0.639	0.361	36488	20782	25744	46815	0	0	0	0	0	0	0	0	0	0	0	0	0	157793	0
6050_supercontig.fasta	110	2953	324830	155115	47.753	2615	0.886	2132	0.722	0.608	0.392	45948	31218	35539	57010	0	0	0	0	0	0	0	0	0	0	0	0	0	155115	0
6051_supercontig.fasta	123	2383	293109	114999	39.234	2003	0.841	1567	0.658	0.541	0.459	43099	37690	43793	53528	0	0	0	0	0	0	0	0	0	0	0	0	0	114999	0
6056_supercontig.fasta	110	3560	391600	207730	53.046	3415	0.959	3005	0.844	0.618	0.382	49341	32040	37334	65155	0	0	0	0	0	0	0	0	0	0	0	0	0	207730	0
6064_supercontig.fasta	77	1944	149688	75904	50.708	1745	0.898	1414	0.727	0.619	0.381	20313	12583	15495	25393	0	0	0	0	0	0	0	0	0	0	0	0	0	75904	0
6068_supercontig.fasta	121	1156	139876	51550	36.854	1082	0.936	1015	0.878	0.604	0.396	23690	17278	17460	29898	0	0	0	0	0	0	0	0	0	0	0	0	0	51550	0
6072_supercontig.fasta	116	2258	261928	117326	44.793	2184	0.967	2015	0.892	0.636	0.364	41473	22441	30027	50661	0	0	0	0	0	0	0	0	0	0	0	0	0	117326	0
6098_supercontig.fasta	124	6333	785292	295148	37.584	5690	0.898	5097	0.805	0.608	0.392	135362	90090	101276	163416	0	0	0	0	0	0	0	0	0	0	0	0	0	295148	0
6110_supercontig.fasta	124	1233	152892	50886	33.282	1140	0.925	1001	0.812	0.601	0.399	28866	17766	22955	32419	0	0	0	0	0	0	0	0	0	0	0	0	0	50886	0
6114_supercontig.fasta	119	2327	276913	152753	55.163	2202	0.946	1907	0.82	0.61	0.39	34518	23671	24479	41492	0	0	0	0	0	0	0	0	0	0	0	0	0	152753	0
6119_supercontig.fasta	124	4928	611072	181394	29.685	4398	0.892	3777	0.766	0.609	0.391	120636	76554	91362	141126	0	0	0	0	0	0	0	0	0	0	0	0	0	181394	0
6128_supercontig.fasta	121	3497	423137	197460	46.666	3403	0.973	3086	0.882	0.618	0.382	68454	34157	51849	71217	0	0	0	0	0	0	0	0	0	0	0	0	0	197460	0
6130_supercontig.fasta	121	1902	230142	94266	40.96	1767	0.929	1592	0.837	0.634	0.366	37608	22301	27095	48872	0	0	0	0	0	0	0	0	0	0	0	0	0	94266	0
6139_supercontig.fasta	121	2890	349690	119217	34.092	2546	0.881	2267	0.784	0.608	0.392	62669	40498	49528	77778	0	0	0	0	0	0	0	0	0	0	0	0	0	119217	0
6148_supercontig.fasta	117	1964	229788	98836	43.012	1913	0.974	1738	0.885	0.612	0.388	34819	22577	28131	45425	0	0	0	0	0	0	0	0	0	0	0	0	0	98836	0
6150_supercontig.fasta	102	2813	286926	138076	48.123	2675	0.951	2422	0.861	0.613	0.387	40241	25530	31525	51554	0	0	0	0	0	0	0	0	0	0	0	0	0	138076	0
6164_supercontig.fasta	87	1283	111621	49196	44.074	1147	0.894	1017	0.793	0.603	0.397	16188	12867	12045	21325	0	0	0	0	0	0	0	0	0	0	0	0	0	49196	0
6175_supercontig.fasta	122	3997	487634	199511	40.914	3802	0.951	3305	0.827	0.622	0.378	80853	48482	60202	98586	0	0	0	0	0	0	0	0	0	0	0	0	0	199511	0
6176_supercontig.fasta	124	5773	715852	313869	43.846	5371	0.93	4864	0.843	0.605	0.395	105948	70695	87350	137990	0	0	0	0	0	0	0	0	0	0	0	0	0	313869	0
6198_supercontig.fasta	121	2491	301411	139706	46.351	2416	0.97	2153	0.864	0.622	0.378	44789	25471	35391	56054	0	0	0	0	0	0	0	0	0	0	0	0	0	139706	0
6216_supercontig.fasta	118	3570	421260	193429	45.917	3313	0.928	2853	0.799	0.612	0.388	59771	43996	44136	79928	0	0	0	0	0	0	0	0	0	0	0	0	0	193429	0
6221_supercontig.fasta	118	1917	226206	79406	35.103	1707	0.89	1496	0.78	0.601	0.399	40737	27831	30640	47592	0	0	0	0	0	0	0	0	0	0	0	0	0	79406	0
6226_supercontig.fasta	124	4072	504928	248697	49.254	3956	0.972	3589	0.881	0.634	0.366	72819	41547	52034	89831	0	0	0	0	0	0	0	0	0	0	0	0	0	248697	0
6227_supercontig.fasta	121	1849	223729	114423	51.144	1758	0.951	1705	0.922	0.587	0.413	31381	19477	25271	33177	0	0	0	0	0	0	0	0	0	0	0	0	0	114423	0
6238_supercontig.fasta	124	3340	414160	175769	42.44	3032	0.908	2684	0.804	0.583	0.417	61695	48907	49998	77791	0	0	0	0	0	0	0	0	0	0	0	0	0	175769	0
6258_supercontig.fasta	119	3232	384608	150886	39.231	2956	0.915	2563	0.793	0.628	0.372	60897	42370	44512	85943	0	0	0	0	0	0	0	0	0	0	0	0	0	150886	0
6265_supercontig.fasta	124	2962	367288	194757	53.026	2895	0.977	2603	0.879	0.637	0.363	47150	28844	33466	63071	0	0	0	0	0	0	0	0	0	0	0	0	0	194757	0
6270_supercontig.fasta	113	1974	223062	107381	48.14	1866	0.945	1763	0.893	0.646	0.354	33142	18299	22744	41496	0	0	0	0	0	0	0	0	0	0	0	0	0	107381	0
6274_supercontig.fasta	121	2638	319198	134511	42.14	2503	0.949	2313	0.877	0.621	0.379	55261	32559	37159	59708	0	0	0	0	0	0	0	0	0	0	0	0	0	134511	0
6282_supercontig.fasta	119	1729	205751	74820	36.364	1580	0.914	1433	0.829	0.611	0.389	37219	21253	29568	42891	0	0	0	0	0	0	0	0	0	0	0	0	0	74820	0
6284_supercontig.fasta	124	2995	371380	110224	29.68	2685	0.896	2407	0.804	0.573	0.427	62699	57176	54164	87117	0	0	0	0	0	0	0	0	0	0	0	0	0	110224	0
6295_supercontig.fasta	123	2974	365802	111658	30.524	2598	0.874	2214	0.744	0.594	0.406	71747	50234	52741	79422	0	0	0	0	0	0	0	0	0	0	0	0	0	111658	0
6298_supercontig.fasta	120	3288	394560	192845	48.876	3140	0.955	2820	0.858	0.622	0.378	54633	33897	42057	71128	0	0	0	0	0	0	0	0	0	0	0	0	0	192845	0
6299_supercontig.fasta	108	1869	201852	95933	47.526	1761	0.942	1555	0.832	0.604	0.396	27335	22336	20010	36238	0	0	0	0	0	0	0	0	0	0	0	0	0	95933	0
6303_supercontig.fasta	124	2920	362080	142388	39.325	2722	0.932	2470	0.846	0.639	0.361	62964	35920	43110	77698	0	0	0	0	0	0	0	0	0	0	0	0	0	142388	0
6318_supercontig.fasta	120	5603	672360	241382	35.901	5132	0.916	4574	0.816	0.626	0.374	118050	69620	91380	151928	0	0	0	0	0	0	0	0	0	0	0	0	0	241382	0
6320_supercontig.fasta	124	5281	654844	224168	34.232	5019	0.95	4483	0.849	0.617	0.383	122840	71323	93056	143457	0	0	0	0	0	0	0	0	0	0	0	0	0	224168	0
6363_supercontig.fasta	123	5936	730128	351422	48.132	5636	0.949	5069	0.854	0.63	0.37	105932	61635	77551	133588	0	0	0	0	0	0	0	0	0	0	0	0	0	351422	0
6366_supercontig.fasta	115	3682	423430	222297	52.499	3291	0.894	2674	0.726	0.597	0.403	54143	37376	43684	65930	0	0	0	0	0	0	0	0	0	0	0	0	0	222297	0
6373_supercontig.fasta	122	2950	359900	132248	36.746	2623	0.889	2370	0.803	0.617	0.383	64482	37796	49042	76332	0	0	0	0	0	0	0	0	0	0	0	0	0	132248	0
6376_supercontig.fasta	119	2840	337960	164622	48.71	2647	0.932	2342	0.825	0.622	0.378	44656	28470	36652	63560	0	0	0	0	0	0	0	0	0	0	0	0	0	164622	0
6378_supercontig.fasta	114	3523	401622	175508	43.7	3307	0.939	2898	0.823	0.621	0.379	62761	40709	44897	77747	0	0	0	0	0	0	0	0	0	0	0	0	0	175508	0
6379_supercontig.fasta	109	1456	158704	77836	49.045	1386	0.952	1284	0.882	0.592	0.408	21732	16773	15858	26505	0	0	0	0	0	0	0	0	0	0	0	0	0	77836	0
6383_supercontig.fasta	123	6727	827421	441035	53.302	6326	0.94	5552	0.825	0.635	0.365	108468	64427	77067	136424	0	0	0	0	0	0	0	0	0	0	0	0	0	441035	0
6384_supercontig.fasta	122	4468	545096	271454	49.799	4292	0.961	3884	0.869	0.62	0.38	76334	48152	55184	93972	0	0	0	0	0	0	0	0	0	0	0	0	0	271454	0
6387_supercontig.fasta	123	1606	197538	49915	25.269	1264	0.787	1136	0.707	0.573	0.427	36271	27698	35231	48423	0	0	0	0	0	0	0	0	0	0	0	0	0	49915	0
6389_supercontig.fasta	124	5652	700848	298819	42.637	5378	0.952	4864	0.861	0.627	0.373	109150	71133	78323	143423	0	0	0	0	0	0	0	0	0	0	0	0	0	298819	0
6393_supercontig.fasta	121	3973	480733	233182	48.506	3810	0.959	3412	0.859	0.619	0.381	66054	45189	49138	87170	0	0	0	0	0	0	0	0	0	0	0	0	0	233182	0
6398_supercontig.fasta	118	2577	304086	164583	54.124	2519	0.977	2317	0.899	0.641	0.359	39060	22927	27140	50376	0	0	0	0	0	0	0	0	0	0	0	0	0	164583	0
6401_supercontig.fasta	118	1536	181248	68340	37.705	1428	0.93	1299	0.846	0.604	0.396	31557	20206	24285	36860	0	0	0	0	0	0	0	0	0	0	0	0	0	68340	0
6404_supercontig.fasta	118	2835	334530	156998	46.931	2662	0.939	2435	0.859	0.628	0.372	47471	29371	36528	64162	0	0	0	0	0	0	0	0	0	0	0	0	0	156998	0
6405_supercontig.fasta	122	4298	524356	229917	43.848	4035	0.939	3676	0.855	0.598	0.402	80124	61789	56141	96385	0	0	0	0	0	0	0	0	0	0	0	0	0	229917	0
6406_supercontig.fasta	112	2910	325920	202837	62.235	2774	0.953	2436	0.837	0.644	0.356	34326	21389	22232	45136	0	0	0	0	0	0	0	0	0	0	0	0	0	202837	0
6407_supercontig.fasta	116	1911	221676	127447	57.492	1847	0.967	1642	0.859	0.614	0.386	25386	15816	20748	32279	0	0	0	0	0	0	0	0	0	0	0	0	0	127447	0
6412_supercontig.fasta	124	1727	214148	67500	31.52	1537	0.89	1416	0.82	0.597	0.403	40828	29584	29334	46902	0	0	0	0	0	0	0	0	0	0	0	0	0	67500	0
6420_supercontig.fasta	124	2153	266972	86668	32.463	1996	0.927	1790	0.831	0.596	0.404	45664	31866	40722	62052	0	0	0	0	0	0	0	0	0	0	0	0	0	86668	0
6430_supercontig.fasta	50	1184	59200	30307	51.194	1014	0.856	766	0.647	0.638	0.362	7297	4804	5612	11180	0	0	0	0	0	0	0	0	0	0	0	0	0	30307	0
6432_supercontig.fasta	124	2060	255440	103164	40.387	1916	0.93	1712	0.831	0.629	0.371	43083	26154	30171	52868	0	0	0	0	0	0	0	0	0	0	0	0	0	103164	0
6439_supercontig.fasta	122	2882	351604	147993	42.091	2795	0.97	2588	0.898	0.635	0.365	59688	32022	41862	70039	0	0	0	0	0	0	0	0	0	0	0	0	0	147993	0
6447_supercontig.fasta	123	1677	206271	106139	51.456	1536	0.916	1413	0.843	0.601	0.399	29993	18919	20839	30381	0	0	0	0	0	0	0	0	0	0	0	0	0	106139	0
6448_supercontig.fasta	106	2800	296800	146612	49.398	2654	0.948	2270	0.811	0.632	0.368	36794	26604	28621	58169	0	0	0	0	0	0	0	0	0	0	0	0	0	146612	0
6449_supercontig.fasta	101	1140	115140	43128	37.457	1066	0.935	966	0.847	0.653	0.347	20674	11241	13733	26364	0	0	0	0	0	0	0	0	0	0	0	0	0	43128	0
6450_supercontig.fasta	124	4367	541508	203623	37.603	4018	0.92	3595	0.823	0.613	0.387	92997	60130	70247	114511	0	0	0	0	0	0	0	0	0	0	0	0	0	203623	0
6454_supercontig.fasta	122	3864	471408	226329	48.011	3735	0.967	3479	0.9	0.646	0.354	69521	39967	46294	89297	0	0	0	0	0	0	0	0	0	0	0	0	0	226329	0
6457_supercontig.fasta	98	1402	137396	71819	52.272	1344	0.959	1149	0.82	0.625	0.375	17874	10988	13439	23276	0	0	0	0	0	0	0	0	0	0	0	0	0	71819	0
6458_supercontig.fasta	119	5642	671398	268819	40.039	5248	0.93	4627	0.82	0.633	0.367	107850	66517	80950	147262	0	0	0	0	0	0	0	0	0	0	0	0	0	268819	0
6459_supercontig.fasta	123	1850	227550	77500	34.058	1651	0.892	1468	0.794	0.601	0.399	39296	27807	31806	51141	0	0	0	0	0	0	0	0	0	0	0	0	0	77500	0
6460_supercontig.fasta	123	2729	335667	140143	41.751	2498	0.915	2210	0.81	0.605	0.395	52766	35652	40862	66244	0	0	0	0	0	0	0	0	0	0	0	0	0	140143	0
6462_supercontig.fasta	121	3273	396033	128835	32.531	3051	0.932	2849	0.87	0.629	0.371	75385	44472	54496	92845	0	0	0	0	0	0	0	0	0	0	0	0	0	128835	0
6483_supercontig.fasta	123	3825	470475	220023	46.766	3693	0.965	3460	0.905	0.632	0.368	72333	40974	49489	87656	0	0	0	0	0	0	0	0	0	0	0	0	0	220023	0
6487_supercontig.fasta	124	4154	515096	144333	28.021	3521	0.848	3107	0.748	0.588	0.412	99927	67501	84744	118591	0	0	0	0	0	0	0	0	0	0	0	0	0	144333	0
6488_supercontig.fasta	120	3137	376440	194335	51.624	2969	0.946	2494	0.795	0.61	0.39	48081	31559	39553	62912	0	0	0	0	0	0	0	0	0	0	0	0	0	194335	0
6492_supercontig.fasta	123	2479	304917	138734	45.499	2341	0.944	2124	0.857	0.605	0.395	42811	29740	35652	57980	0	0	0	0	0	0	0	0	0	0	0	0	0	138734	0
6494_supercontig.fasta	124	3516	435984	145697	33.418	3046	0.866	2786	0.792	0.604	0.396	76300	52241	62324	99422	0	0	0	0	0	0	0	0	0	0	0	0	0	145697	0
6496_supercontig.fasta	119	3581	426139	182590	42.848	3502	0.978	3132	0.875	0.625	0.375	64585	44052	47102	87810	0	0	0	0	0	0	0	0	0	0	0	0	0	182590	0
6498_supercontig.fasta	114	1169	133266	56023	42.038	995	0.851	915	0.783	0.553	0.447	19155	18654	15545	23889	0	0	0	0	0	0	0	0	0	0	0	0	0	56023	0
6500_supercontig.fasta	124	4460	553040	193201	34.934	4000	0.897	3494	0.783	0.606	0.394	99460	64056	77276	119047	0	0	0	0	0	0	0	0	0	0	0	0	0	193201	0
6506_supercontig.fasta	117	3360	393120	219737	55.896	3310	0.985	3063	0.912	0.632	0.368	49351	30854	32814	60364	0	0	0	0	0	0	0	0	0	0	0	0	0	219737	0
6507_supercontig.fasta	118	1521	179478	91720	51.104	1477	0.971	1348	0.886	0.641	0.359	23500	14100	17455	32703	0	0	0	0	0	0	0	0	0	0	0	0	0	91720	0
6514_supercontig.fasta	5	921	4605	2082	45.212	300	0.326	82	0.089	0.6	0.4	615	519	496	893	0	0	0	0	0	0	0	0	0	0	0	0	0	2082	0
6526_supercontig.fasta	95	1691	160645	85096	52.971	1536	0.908	1340	0.792	0.629	0.371	22345	13336	14789	25079	0	0	0	0	0	0	0	0	0	0	0	0	0	85096	0
6527_supercontig.fasta	124	4264	528736	226366	42.813	4014	0.941	3484	0.817	0.622	0.378	84174	51322	62706	104168	0	0	0	0	0	0	0	0	0	0	0	0	0	226366	0
6528_supercontig.fasta	124	1209	149916	50118	33.431	1098	0.908	993	0.821	0.605	0.395	27032	17713	21396	33657	0	0	0	0	0	0	0	0	0	0	0	0	0	50118	0
6531_supercontig.fasta	29	2274	65946	25567	38.77	1944	0.855	1243	0.547	0.643	0.357	11691	6133	8276	14279	0	0	0	0	0	0	0	0	0	0	0	0	0	25567	0
6532_supercontig.fasta	120	2438	292560	138920	47.484	2344	0.961	2191	0.899	0.635	0.365	44728	25205	30683	53024	0	0	0	0	0	0	0	0	0	0	0	0	0	138920	0
6533_supercontig.fasta	124	4885	605740	235490	38.876	4633	0.948	4175	0.855	0.633	0.367	101549	59978	75588	133135	0	0	0	0	0	0	0	0	0	0	0	0	0	235490	0
6538_supercontig.fasta	122	2057	250954	111165	44.297	1936	0.941	1724	0.838	0.611	0.389	40576	28234	25739	45240	0	0	0	0	0	0	0	0	0	0	0	0	0	111165	0
6540_supercontig.fasta	123	1896	233208	133189	57.112	1853	0.977	1723	0.909	0.637	0.363	25602	16603	19835	37979	0	0	0	0	0	0	0	0	0	0	0	0	0	133189	0
6544_supercontig.fasta	121	7360	890560	555318	62.356	6838	0.929	5903	0.802	0.619	0.381	90116	57849	69684	117593	0	0	0	0	0	0	0	0	0	0	0	0	0	555318	0
6550_supercontig.fasta	118	1397	164846	76575	46.452	1319	0.944	1241	0.888	0.619	0.381	25923	13953	19382	29013	0	0	0	0	0	0	0	0	0	0	0	0	0	76575	0
6552_supercontig.fasta	120	3301	396120	193723	48.905	3190	0.966	2832	0.858	0.637	0.363	54186	33640	39354	75217	0	0	0	0	0	0	0	0	0	0	0	0	0	193723	0
6557_supercontig.fasta	43	1849	79507	50608	63.652	1597	0.864	1128	0.61	0.634	0.366	7432	5365	5254	10848	0	0	0	0	0	0	0	0	0	0	0	0	0	50608	0
6559_supercontig.fasta	124	2005	248620	108054	43.462	1868	0.932	1682	0.839	0.603	0.397	37806	24650	30995	47115	0	0	0	0	0	0	0	0	0	0	0	0	0	108054	0
6563_supercontig.fasta	120	2659	319080	136696	42.841	2450	0.921	2285	0.859	0.625	0.375	49297	30191	38026	64870	0	0	0	0	0	0	0	0	0	0	0	0	0	136696	0
6565_supercontig.fasta	86	1687	145082	69512	47.912	1634	0.969	1400	0.83	0.633	0.367	19580	12799	14921	28270	0	0	0	0	0	0	0	0	0	0	0	0	0	69512	0
6570_supercontig.fasta	121	2362	285802	106888	37.399	2185	0.925	2004	0.848	0.6	0.4	46185	31299	39827	61603	0	0	0	0	0	0	0	0	0	0	0	0	0	106888	0
6572_supercontig.fasta	123	3833	471459	215629	45.737	3649	0.952	3296	0.86	0.629	0.371	71324	44075	50646	89785	0	0	0	0	0	0	0	0	0	0	0	0	0	215629	0
6601_supercontig.fasta	113	2536	286568	143687	50.141	2324	0.916	1961	0.773	0.62	0.38	39790	24654	29409	49028	0	0	0	0	0	0	0	0	0	0	0	0	0	143687	0
6620_supercontig.fasta	124	1452	180048	61378	34.09	1289	0.888	1221	0.841	0.597	0.403	35332	19455	28037	35846	0	0	0	0	0	0	0	0	0	0	0	0	0	61378	0
6631_supercontig.fasta	101	2694	272094	160051	58.822	2565	0.952	2191	0.813	0.623	0.377	30051	20911	21057	40024	0	0	0	0	0	0	0	0	0	0	0	0	0	160051	0
6636_supercontig.fasta	109	2286	249174	124731	50.058	2146	0.939	1884	0.824	0.603	0.397	32148	23379	25612	43304	0	0	0	0	0	0	0	0	0	0	0	0	0	124731	0
6639_supercontig.fasta	121	2208	267168	104327	39.049	2067	0.936	1927	0.873	0.616	0.384	41797	27933	34423	58688	0	0	0	0	0	0	0	0	0	0	0	0	0	104327	0
6641_supercontig.fasta	123	2164	266172	126959	47.698	2071	0.957	1939	0.896	0.588	0.412	39395	29404	28200	42214	0	0	0	0	0	0	0	0	0	0	0	0	0	126959	0
6649_supercontig.fasta	118	2273	268214	120216	44.821	2233	0.982	2121	0.933	0.646	0.354	41235	23507	28743	54513	0	0	0	0	0	0	0	0	0	0	0	0	0	120216	0
6652_supercontig.fasta	124	3132	388368	121450	31.272	2847	0.909	2476	0.791	0.603	0.397	61073	52236	53693	99916	0	0	0	0	0	0	0	0	0	0	0	0	0	121450	0
6660_supercontig.fasta	123	2921	359283	132024	36.747	2826	0.967	2619	0.897	0.615	0.385	64271	38077	48979	75932	0	0	0	0	0	0	0	0	0	0	0	0	0	132024	0
6667_supercontig.fasta	122	3292	401624	160315	39.917	3034	0.922	2576	0.783	0.612	0.388	67906	41567	51808	80028	0	0	0	0	0	0	0	0	0	0	0	0	0	160315	0
6679_supercontig.fasta	107	2434	260438	151669	58.236	2183	0.897	1848	0.759	0.616	0.384	28933	19473	21999	38364	0	0	0	0	0	0	0	0	0	0	0	0	0	151669	0
6685_supercontig.fasta	124	3694	458056	196256	42.845	3505	0.949	3144	0.851	0.624	0.376	69766	45487	52729	93818	0	0	0	0	0	0	0	0	0	0	0	0	0	196256	0
6689_supercontig.fasta	123	5770	709710	316263	44.562	5555	0.963	5152	0.893	0.646	0.354	105354	65123	73932	149038	0	0	0	0	0	0	0	0	0	0	0	0	0	316263	0
6705_supercontig.fasta	102	1022	104244	47700	45.758	959	0.938	883	0.864	0.535	0.465	15599	11816	14039	15090	0	0	0	0	0	0	0	0	0	0	0	0	0	47700	0
6713_supercontig.fasta	106	1907	202142	89650	44.35	1794	0.941	1616	0.847	0.638	0.362	27711	19738	21022	44021	0	0	0	0	0	0	0	0	0	0	0	0	0	89650	0
6717_supercontig.fasta	124	4318	535432	158932	29.683	3924	0.909	3466	0.803	0.595	0.405	105275	58358	93996	118871	0	0	0	0	0	0	0	0	0	0	0	0	0	158932	0
6732_supercontig.fasta	111	1825	202575	89627	44.244	1725	0.945	1512	0.828	0.613	0.387	32243	19740	23725	37240	0	0	0	0	0	0	0	0	0	0	0	0	0	89627	0
6733_supercontig.fasta	109	1746	190314	96921	50.927	1578	0.904	1368	0.784	0.636	0.364	26831	14360	19651	32551	0	0	0	0	0	0	0	0	0	0	0	0	0	96921	0
6738_supercontig.fasta	110	1625	178750	84460	47.25	1547	0.952	1398	0.86	0.612	0.388	28038	16081	20202	29969	0	0	0	0	0	0	0	0	0	0	0	0	0	84460	0
6746_supercontig.fasta	111	1306	144966	69516	47.953	1258	0.963	1173	0.898	0.638	0.362	21147	11343	15889	27071	0	0	0	0	0	0	0	0	0	0	0	0	0	69516	0
6779_supercontig.fasta	120	2037	244440	96467	39.464	1874	0.92	1720	0.844	0.599	0.401	42177	28525	30502	46769	0	0	0	0	0	0	0	0	0	0	0	0	0	96467	0
6780_supercontig.fasta	115	1771	203665	84534	41.506	1669	0.942	1562	0.882	0.632	0.368	33395	17930	25620	42186	0	0	0	0	0	0	0	0	0	0	0	0	0	84534	0
6782_supercontig.fasta	122	2207	269254	97893	36.357	2095	0.949	1961	0.889	0.616	0.384	43484	27843	37478	62556	0	0	0	0	0	0	0	0	0	0	0	0	0	97893	0
6785_supercontig.fasta	119	2150	255850	137040	53.563	1965	0.914	1767	0.822	0.625	0.375	31492	18821	25759	42738	0	0	0	0	0	0	0	0	0	0	0	0	0	137040	0
6791_supercontig.fasta	114	2394	272916	129314	47.382	2290	0.957	2027	0.847	0.628	0.372	40408	24615	28530	50049	0	0	0	0	0	0	0	0	0	0	0	0	0	129314	0
6792_supercontig.fasta	117	3625	424125	214516	50.578	3461	0.955	3112	0.858	0.626	0.374	57748	35641	42076	74144	0	0	0	0	0	0	0	0	0	0	0	0	0	214516	0
6797_supercontig.fasta	123	3014	370722	128847	34.756	2779	0.922	2494	0.827	0.613	0.387	73629	40012	53516	74718	0	0	0	0	0	0	0	0	0	0	0	0	0	128847	0
6825_supercontig.fasta	121	2110	255310	114011	44.656	2012	0.954	1874	0.888	0.585	0.415	38380	27323	31033	44563	0	0	0	0	0	0	0	0	0	0	0	0	0	114011	0
6848_supercontig.fasta	121	2914	352594	190788	54.11	2841	0.975	2614	0.897	0.612	0.388	44530	28588	34129	54559	0	0	0	0	0	0	0	0	0	0	0	0	0	190788	0
6854_supercontig.fasta	103	2744	282632	141395	50.028	2629	0.958	2347	0.855	0.628	0.372	38655	24495	27643	50444	0	0	0	0	0	0	0	0	0	0	0	0	0	141395	0
6859_supercontig.fasta	122	4071	496662	204408	41.156	3871	0.951	3469	0.852	0.617	0.383	80241	52522	58720	100771	0	0	0	0	0	0	0	0	0	0	0	0	0	204408	0
6860_supercontig.fasta	122	2395	292190	116509	39.874	2216	0.925	1993	0.832	0.619	0.381	52951	25604	41119	56007	0	0	0	0	0	0	0	0	0	0	0	0	0	116509	0
6864_supercontig.fasta	64	2691	172224	116048	67.382	2478	0.921	1909	0.709	0.624	0.376	14327	9682	11257	20910	0	0	0	0	0	0	0	0	0	0	0	0	0	116048	0
6865_supercontig.fasta	123	3898	479454	228017	47.558	3746	0.961	3463	0.888	0.639	0.361	70436	39976	50574	90451	0	0	0	0	0	0	0	0	0	0	0	0	0	228017	0
6875_supercontig.fasta	124	1632	202368	59838	29.569	1243	0.762	981	0.601	0.55	0.45	37403	24325	40129	40673	0	0	0	0	0	0	0	0	0	0	0	0	0	59838	0
6882_supercontig.fasta	120	2588	310560	126150	40.62	2489	0.962	2280	0.881	0.608	0.392	54880	31947	40279	57304	0	0	0	0	0	0	0	0	0	0	0	0	0	126150	0
6883_supercontig.fasta	122	2359	287798	111382	38.701	2120	0.899	1998	0.847	0.642	0.358	50256	28408	34551	63201	0	0	0	0	0	0	0	0	0	0	0	0	0	111382	0
6886_supercontig.fasta	60	607	36420	16308	44.778	560	0.923	441	0.727	0.643	0.357	5593	3682	3538	7299	0	0	0	0	0	0	0	0	0	0	0	0	0	16308	0
6893_supercontig.fasta	107	1482	158574	81732	51.542	1417	0.956	1323	0.893	0.626	0.374	21236	14320	14486	26800	0	0	0	0	0	0	0	0	0	0	0	0	0	81732	0
6909_supercontig.fasta	120	2997	359640	154906	43.073	2876	0.96	2571	0.858	0.621	0.379	57361	35425	41879	70069	0	0	0	0	0	0	0	0	0	0	0	0	0	154906	0
6913_supercontig.fasta	124	5788	717712	321757	44.831	5586	0.965	5121	0.885	0.624	0.376	112518	68131	80594	134712	0	0	0	0	0	0	0	0	0	0	0	0	0	321757	0
6914_supercontig.fasta	122	3072	374784	176222	47.02	2945	0.959	2672	0.87	0.616	0.384	55682	35091	40542	67247	0	0	0	0	0	0	0	0	0	0	0	0	0	176222	0
6924_supercontig.fasta	124	3754	465496	134287	28.848	3415	0.91	2999	0.799	0.6	0.4	92005	57643	74717	106844	0	0	0	0	0	0	0	0	0	0	0	0	0	134287	0
6933_supercontig.fasta	112	2688	301056	151355	50.275	2528	0.94	2207	0.821	0.622	0.378	39238	25847	30424	54192	0	0	0	0	0	0	0	0	0	0	0	0	0	151355	0
6946_supercontig.fasta	123	2005	246615	126310	51.217	1935	0.965	1819	0.907	0.591	0.409	34379	19976	28746	37204	0	0	0	0	0	0	0	0	0	0	0	0	0	126310	0
6947_supercontig.fasta	120	7011	841320	461669	54.874	6011	0.857	4785	0.682	0.616	0.384	105510	62436	82916	128789	0	0	0	0	0	0	0	0	0	0	0	0	0	461669	0
6954_supercontig.fasta	124	1674	207576	65432	31.522	1491	0.891	1358	0.811	0.598	0.402	39107	25360	31535	46142	0	0	0	0	0	0	0	0	0	0	0	0	0	65432	0
6955_supercontig.fasta	121	1158	140118	45120	32.201	1017	0.878	964	0.832	0.6	0.4	22910	17363	20530	34195	0	0	0	0	0	0	0	0	0	0	0	0	0	45120	0
6958_supercontig.fasta	117	2559	299403	130467	43.576	2391	0.934	2109	0.824	0.632	0.368	44866	27216	34627	62227	0	0	0	0	0	0	0	0	0	0	0	0	0	130467	0
6961_supercontig.fasta	120	4078	489360	201119	41.098	3776	0.926	3307	0.811	0.621	0.379	79797	48532	60522	99390	0	0	0	0	0	0	0	0	0	0	0	0	0	201119	0
6962_supercontig.fasta	122	1898	231556	115754	49.99	1785	0.94	1638	0.863	0.614	0.386	32074	20138	24349	39241	0	0	0	0	0	0	0	0	0	0	0	0	0	115754	0
6968_supercontig.fasta	118	3300	389400	170216	43.712	2997	0.908	2676	0.811	0.61	0.39	55199	41249	43828	78908	0	0	0	0	0	0	0	0	0	0	0	0	0	170216	0
6969_supercontig.fasta	92	1368	125856	60998	48.467	1299	0.95	1157	0.846	0.604	0.396	16647	13063	12492	22656	0	0	0	0	0	0	0	0	0	0	0	0	0	60998	0
6977_supercontig.fasta	112	2143	240016	129612	54.001	2080	0.971	1866	0.871	0.646	0.354	30685	18463	20489	40767	0	0	0	0	0	0	0	0	0	0	0	0	0	129612	0
6978_supercontig.fasta	123	3149	387327	180088	46.495	2996	0.951	2711	0.861	0.616	0.384	55718	37759	40603	73159	0	0	0	0	0	0	0	0	0	0	0	0	0	180088	0
6979_supercontig.fasta	124	1787	221588	63798	28.791	1510	0.845	1374	0.769	0.591	0.409	45386	27803	36645	47956	0	0	0	0	0	0	0	0	0	0	0	0	0	63798	0
6992_supercontig.fasta	122	3650	445300	237232	53.275	3540	0.97	3243	0.888	0.662	0.338	59676	32579	37642	78171	0	0	0	0	0	0	0	0	0	0	0	0	0	237232	0
6995_supercontig.fasta	105	1703	178815	96367	53.892	1626	0.955	1467	0.861	0.642	0.358	21396	13605	15706	31741	0	0	0	0	0	0	0	0	0	0	0	0	0	96367	0
7013_supercontig.fasta	90	1904	171360	82571	48.186	1719	0.903	1427	0.749	0.633	0.367	25303	16660	15826	31000	0	0	0	0	0	0	0	0	0	0	0	0	0	82571	0
7021_supercontig.fasta	112	2675	299600	157177	52.462	2572	0.961	2291	0.856	0.631	0.369	37299	23893	28463	52768	0	0	0	0	0	0	0	0	0	0	0	0	0	157177	0
7024_supercontig.fasta	63	1564	98532	53699	54.499	1483	0.948	1241	0.793	0.622	0.378	13034	8229	8544	15026	0	0	0	0	0	0	0	0	0	0	0	0	0	53699	0
7028_supercontig.fasta	117	1581	184977	90810	49.093	1501	0.949	1423	0.9	0.631	0.369	28336	15777	18699	31355	0	0	0	0	0	0	0	0	0	0	0	0	0	90810	0
7029_supercontig.fasta	120	3963	475560	260304	54.736	3854	0.972	3455	0.872	0.634	0.366	57599	36963	41212	79482	0	0	0	0	0	0	0	0	0	0	0	0	0	260304	0
7067_supercontig.fasta	121	1314	158994	58010	36.486	1158	0.881	1044	0.795	0.623	0.377	29226	16102	21883	33773	0	0	0	0	0	0	0	0	0	0	0	0	0	58010	0
7111_supercontig.fasta	124	2493	309132	116920	37.822	2295	0.921	2098	0.842	0.629	0.371	53406	31667	39475	67664	0	0	0	0	0	0	0	0	0	0	0	0	0	116920	0
7128_supercontig.fasta	124	4205	521420	180672	34.65	3963	0.942	3603	0.857	0.629	0.371	98244	57701	68368	116435	0	0	0	0	0	0	0	0	0	0	0	0	0	180672	0
7135_supercontig.fasta	84	1900	159600	90359	56.616	1765	0.929	1423	0.749	0.609	0.391	17643	12352	14495	24751	0	0	0	0	0	0	0	0	0	0	0	0	0	90359	0
7136_supercontig.fasta	110	2441	268510	128079	47.7	2256	0.924	1946	0.797	0.633	0.367	40744	24371	27221	48095	0	0	0	0	0	0	0	0	0	0	0	0	0	128079	0
7141_supercontig.fasta	118	1699	200482	75957	37.887	1536	0.904	1358	0.799	0.563	0.437	34184	24398	29786	36157	0	0	0	0	0	0	0	0	0	0	0	0	0	75957	0
7174_supercontig.fasta	121	3915	473715	152421	32.176	3640	0.93	3284	0.839	0.617	0.383	88895	54012	68976	109411	0	0	0	0	0	0	0	0	0	0	0	0	0	152421	0
7194_supercontig.fasta	92	1920	176640	94279	53.374	1821	0.948	1593	0.83	0.606	0.394	22103	16077	16198	27983	0	0	0	0	0	0	0	0	0	0	0	0	0	94279	0
7241_supercontig.fasta	59	1677	98943	53640	54.213	1562	0.931	1279	0.763	0.586	0.414	11797	10555	8282	14669	0	0	0	0	0	0	0	0	0	0	0	0	0	53640	0
7273_supercontig.fasta	117	1655	193635	81114	41.89	1560	0.943	1411	0.853	0.624	0.376	33453	20109	22019	36940	0	0	0	0	0	0	0	0	0	0	0	0	0	81114	0
7279_supercontig.fasta	121	3467	419507	175827	41.913	3253	0.938	2997	0.864	0.621	0.379	68435	42757	49204	83284	0	0	0	0	0	0	0	0	0	0	0	0	0	175827	0
7296_supercontig.fasta	106	1682	178292	90696	50.869	1598	0.95	1428	0.849	0.632	0.368	26249	15027	17255	29065	0	0	0	0	0	0	0	0	0	0	0	0	0	90696	0
7313_supercontig.fasta	123	2755	338865	107598	31.752	2420	0.878	2121	0.77	0.587	0.413	57372	40256	54890	78749	0	0	0	0	0	0	0	0	0	0	0	0	0	107598	0
7324_supercontig.fasta	124	2162	268088	85789	32.0	1905	0.881	1744	0.807	0.605	0.395	52647	33706	37957	57989	0	0	0	0	0	0	0	0	0	0	0	0	0	85789	0
7325_supercontig.fasta	92	1077	99084	34204	34.52	964	0.895	854	0.793	0.562	0.438	17391	14056	14061	19372	0	0	0	0	0	0	0	0	0	0	0	0	0	34204	0
7331_supercontig.fasta	119	4329	515151	303889	58.99	3866	0.893	3210	0.742	0.63	0.37	56133	38379	40661	76089	0	0	0	0	0	0	0	0	0	0	0	0	0	303889	0
7333_supercontig.fasta	124	1362	168888	51502	30.495	1170	0.859	1066	0.783	0.51	0.49	32997	22912	34154	27323	0	0	0	0	0	0	0	0	0	0	0	0	0	51502	0
7336_supercontig.fasta	124	1188	147312	56474	38.336	1067	0.898	968	0.815	0.538	0.462	24512	18397	23086	24843	0	0	0	0	0	0	0	0	0	0	0	0	0	56474	0
7361_supercontig.fasta	89	2173	193397	119098	61.582	1980	0.911	1545	0.711	0.624	0.376	19568	13137	14387	27207	0	0	0	0	0	0	0	0	0	0	0	0	0	119098	0
7363_supercontig.fasta	124	2213	274412	104960	38.249	2078	0.939	1908	0.862	0.614	0.386	45987	28712	36467	58286	0	0	0	0	0	0	0	0	0	0	0	0	0	104960	0
7367_supercontig.fasta	121	1586	191906	79521	41.437	1463	0.922	1357	0.856	0.613	0.387	33679	20718	22749	35239	0	0	0	0	0	0	0	0	0	0	0	0	0	79521	0
7371_supercontig.fasta	124	1349	167276	73835	44.14	1269	0.941	1174	0.87	0.624	0.376	28040	15475	19597	30329	0	0	0	0	0	0	0	0	0	0	0	0	0	73835	0
7572_supercontig.fasta	120	2845	341400	137416	40.251	2609	0.917	2308	0.811	0.599	0.401	55243	37433	44036	67272	0	0	0	0	0	0	0	0	0	0	0	0	0	137416	0
7577_supercontig.fasta	104	1035	107640	38476	35.745	908	0.877	807	0.78	0.583	0.417	18473	13882	14961	21848	0	0	0	0	0	0	0	0	0	0	0	0	0	38476	0
7583_supercontig.fasta	119	2650	315350	150303	47.662	2356	0.889	1868	0.705	0.521	0.479	38255	43258	35128	48406	0	0	0	0	0	0	0	0	0	0	0	0	0	150303	0
7602_supercontig.fasta	118	3901	460318	199794	43.403	3644	0.934	3203	0.821	0.573	0.427	68190	49888	61476	80970	0	0	0	0	0	0	0	0	0	0	0	0	0	199794	0
7628_supercontig.fasta	122	2237	272914	140997	51.664	2119	0.947	1866	0.834	0.618	0.382	39373	20030	29935	42579	0	0	0	0	0	0	0	0	0	0	0	0	0	140997	0
4471_CDS.fasta	124	950	117800	50596	42.951	673	0.708	452	0.476	0.581	0.419	17361	12015	16118	21710	0	0	0	0	0	0	0	0	0	0	0	0	0	50596	0
4527_CDS.fasta	122	1329	162138	8143	5.022	832	0.626	644	0.485	0.538	0.462	39809	27761	43321	43104	0	0	0	0	0	0	0	0	0	0	0	0	0	8143	0
4691_CDS.fasta	121	536	64856	11251	17.348	367	0.685	295	0.55	0.526	0.474	13741	11597	13772	14495	0	0	0	0	0	0	0	0	0	0	0	0	0	11251	0
4724_CDS.fasta	124	693	85932	8803	10.244	496	0.716	397	0.573	0.571	0.429	24077	13964	19158	19930	0	0	0	0	0	0	0	0	0	0	0	0	0	8803	0
4744_CDS.fasta	103	496	51088	26188	51.261	320	0.645	216	0.435	0.591	0.409	6927	4777	5370	7826	0	0	0	0	0	0	0	0	0	0	0	0	0	26188	0
4757_CDS.fasta	124	633	78492	12579	16.026	421	0.665	333	0.526	0.559	0.441	18526	13206	15853	18328	0	0	0	0	0	0	0	0	0	0	0	0	0	12579	0
4793_CDS.fasta	124	1879	232996	68097	29.227	1473	0.784	1132	0.602	0.576	0.424	43556	30945	38930	51468	0	0	0	0	0	0	0	0	0	0	0	0	0	68097	0
4796_CDS.fasta	121	896	108416	28479	26.268	721	0.805	518	0.578	0.576	0.424	22230	14224	19708	23775	0	0	0	0	0	0	0	0	0	0	0	0	0	28479	0
4802_CDS.fasta	121	894	108174	14362	13.277	662	0.74	487	0.545	0.56	0.44	26971	14960	26308	25573	0	0	0	0	0	0	0	0	0	0	0	0	0	14362	0
4806_CDS.fasta	121	724	87604	25505	29.114	593	0.819	456	0.63	0.576	0.424	17675	10644	15769	18011	0	0	0	0	0	0	0	0	0	0	0	0	0	25505	0
4848_CDS.fasta	122	2260	275720	57413	20.823	1705	0.754	1379	0.61	0.553	0.447	60168	41198	56442	60499	0	0	0	0	0	0	0	0	0	0	0	0	0	57413	0
4889_CDS.fasta	114	567	64638	12781	19.773	412	0.727	333	0.587	0.589	0.411	15523	8202	13142	14990	0	0	0	0	0	0	0	0	0	0	0	0	0	12781	0
4890_CDS.fasta	121	612	74052	16566	22.371	483	0.789	403	0.658	0.525	0.475	13894	11623	15734	16235	0	0	0	0	0	0	0	0	0	0	0	0	0	16566	0
4893_CDS.fasta	124	819	101556	12693	12.499	532	0.65	385	0.47	0.589	0.411	27513	14230	22284	24836	0	0	0	0	0	0	0	0	0	0	0	0	0	12693	0
4932_CDS.fasta	123	1137	139851	10047	7.184	751	0.661	627	0.551	0.592	0.408	38520	21595	31436	38253	0	0	0	0	0	0	0	0	0	0	0	0	0	10047	0
4942_CDS.fasta	122	972	118584	30658	25.853	732	0.753	567	0.583	0.522	0.478	20847	20275	21487	25317	0	0	0	0	0	0	0	0	0	0	0	0	0	30658	0
4951_CDS.fasta	118	812	95816	35244	36.783	443	0.546	313	0.385	0.57	0.43	16521	12634	13253	18164	0	0	0	0	0	0	0	0	0	0	0	0	0	35244	0
4954_CDS.fasta	124	1032	127968	30225	23.619	739	0.716	586	0.568	0.586	0.414	30048	12774	27810	27111	0	0	0	0	0	0	0	0	0	0	0	0	0	30225	0
4989_CDS.fasta	122	807	98454	14836	15.069	574	0.711	443	0.549	0.576	0.424	26509	13497	22010	21602	0	0	0	0	0	0	0	0	0	0	0	0	0	14836	0
4992_CDS.fasta	124	2271	281604	71085	25.243	1586	0.698	1161	0.511	0.6	0.4	64184	36216	47654	62465	0	0	0	0	0	0	0	0	0	0	0	0	0	71085	0
5018_CDS.fasta	123	1283	157809	40088	25.403	932	0.726	758	0.591	0.567	0.433	31712	24175	26815	35019	0	0	0	0	0	0	0	0	0	0	0	0	0	40088	0
5032_CDS.fasta	121	1466	177386	84195	47.464	1099	0.75	807	0.55	0.578	0.422	32847	15070	24295	20979	0	0	0	0	0	0	0	0	0	0	0	0	0	84195	0
5034_CDS.fasta	122	758	92476	10425	11.273	567	0.748	463	0.611	0.568	0.432	21125	16818	18610	25498	0	0	0	0	0	0	0	0	0	0	0	0	0	10425	0
5038_CDS.fasta	123	799	98277	40283	40.989	584	0.731	419	0.524	0.567	0.433	15350	11008	14167	17469	0	0	0	0	0	0	0	0	0	0	0	0	0	40283	0
5064_CDS.fasta	87	216	18792	1116	5.939	110	0.509	88	0.407	0.523	0.477	4912	4129	4307	4328	0	0	0	0	0	0	0	0	0	0	0	0	0	1116	0
5090_CDS.fasta	117	595	69615	16195	23.264	388	0.652	278	0.467	0.507	0.493	12588	11902	14468	14462	0	0	0	0	0	0	0	0	0	0	0	0	0	16195	0
5104_CDS.fasta	97	327	31719	10316	32.523	233	0.713	165	0.505	0.547	0.453	5779	4849	4852	5923	0	0	0	0	0	0	0	0	0	0	0	0	0	10316	0
5116_CDS.fasta	123	1106	136038	28435	20.902	820	0.741	643	0.581	0.556	0.444	29281	20573	27327	30422	0	0	0	0	0	0	0	0	0	0	0	0	0	28435	0
5123_CDS.fasta	122	1227	149694	49074	32.783	978	0.797	774	0.631	0.563	0.437	29284	16065	28000	27271	0	0	0	0	0	0	0	0	0	0	0	0	0	49074	0
5131_CDS.fasta	121	1145	138545	43866	31.662	810	0.707	580	0.507	0.557	0.443	24491	16256	25799	28133	0	0	0	0	0	0	0	0	0	0	0	0	0	43866	0
5138_CDS.fasta	120	912	109440	19757	18.053	668	0.732	491	0.538	0.577	0.423	26095	17936	19962	25690	0	0	0	0	0	0	0	0	0	0	0	0	0	19757	0
5162_CDS.fasta	122	1470	179340	29282	16.328	1195	0.813	991	0.674	0.547	0.453	40483	34151	33749	41675	0	0	0	0	0	0	0	0	0	0	0	0	0	29282	0
5163_CDS.fasta	121	1628	196988	35298	17.919	1150	0.706	824	0.506	0.587	0.413	47945	29506	37327	46912	0	0	0	0	0	0	0	0	0	0	0	0	0	35298	0
5168_CDS.fasta	120	861	103320	19202	18.585	698	0.811	535	0.621	0.537	0.463	21942	15976	22941	23259	0	0	0	0	0	0	0	0	0	0	0	0	0	19202	0
5177_CDS.fasta	120	937	112440	40380	35.912	672	0.717	528	0.564	0.543	0.457	18484	13137	19870	20569	0	0	0	0	0	0	0	0	0	0	0	0	0	40380	0
5188_CDS.fasta	121	801	96921	27866	28.751	613	0.765	433	0.541	0.548	0.452	21427	11860	19456	16312	0	0	0	0	0	0	0	0	0	0	0	0	0	27866	0
5200_CDS.fasta	123	807	99261	31556	31.791	549	0.68	391	0.485	0.537	0.463	18993	13792	17643	17277	0	0	0	0	0	0	0	0	0	0	0	0	0	31556	0
5206_CDS.fasta	123	555	68265	12356	18.1	424	0.764	294	0.53	0.566	0.434	17838	10457	13837	13777	0	0	0	0	0	0	0	0	0	0	0	0	0	12356	0
5220_CDS.fasta	116	641	74356	26674	35.873	506	0.789	355	0.554	0.584	0.416	14081	8775	11081	13745	0	0	0	0	0	0	0	0	0	0	0	0	0	26674	0
5257_CDS.fasta	123	1074	132102	41190	31.18	854	0.795	607	0.565	0.565	0.435	28184	17191	22397	23140	0	0	0	0	0	0	0	0	0	0	0	0	0	41190	0
5260_CDS.fasta	87	393	34191	20515	60.001	266	0.677	167	0.425	0.577	0.423	4372	3037	2855	3412	0	0	0	0	0	0	0	0	0	0	0	0	0	20515	0
5264_CDS.fasta	123	1533	188559	29167	15.468	1065	0.695	804	0.524	0.567	0.433	49285	29757	39141	41209	0	0	0	0	0	0	0	0	0	0	0	0	0	29167	0
5271_CDS.fasta	121	699	84579	22555	26.667	536	0.767	433	0.619	0.584	0.416	19212	10367	15450	16995	0	0	0	0	0	0	0	0	0	0	0	0	0	22555	0
5273_CDS.fasta	119	1752	208488	58000	27.819	1376	0.785	1089	0.622	0.574	0.426	44098	27084	36978	42328	0	0	0	0	0	0	0	0	0	0	0	0	0	58000	0
5280_CDS.fasta	124	1234	153016	23945	15.649	767	0.622	583	0.472	0.576	0.424	35180	24549	30201	39141	0	0	0	0	0	0	0	0	0	0	0	0	0	23945	0
5296_CDS.fasta	121	985	119185	30442	25.542	650	0.66	447	0.454	0.549	0.451	24260	15943	24133	24407	0	0	0	0	0	0	0	0	0	0	0	0	0	30442	0
5299_CDS.fasta	117	933	109161	48728	44.639	730	0.782	522	0.559	0.599	0.401	16304	10922	13168	20039	0	0	0	0	0	0	0	0	0	0	0	0	0	48728	0
5304_CDS.fasta	122	609	74298	17698	23.82	476	0.782	378	0.621	0.573	0.427	17618	9466	14643	14873	0	0	0	0	0	0	0	0	0	0	0	0	0	17698	0
5318_CDS.fasta	123	600	73800	12428	16.84	407	0.678	317	0.528	0.552	0.448	16261	11949	15565	17597	0	0	0	0	0	0	0	0	0	0	0	0	0	12428	0
5326_CDS.fasta	124	1404	174096	42180	24.228	1029	0.733	758	0.54	0.551	0.449	36370	24601	34593	36352	0	0	0	0	0	0	0	0	0	0	0	0	0	42180	0
5328_CDS.fasta	117	705	82485	21106	25.588	530	0.752	443	0.628	0.531	0.469	18354	9176	19614	14235	0	0	0	0	0	0	0	0	0	0	0	0	0	21106	0
5333_CDS.fasta	123	2457	302211	33807	11.187	1982	0.807	1605	0.653	0.582	0.418	78007	46326	65539	78532	0	0	0	0	0	0	0	0	0	0	0	0	0	33807	0
5335_CDS.fasta	124	1340	166160	43341	26.084	996	0.743	741	0.553	0.566	0.434	36702	22981	30653	32483	0	0	0	0	0	0	0	0	0	0	0	0	0	43341	0
5339_CDS.fasta	113	1445	163285	80807	49.488	1114	0.771	773	0.535	0.581	0.419	25556	14583	20379	21960	0	0	0	0	0	0	0	0	0	0	0	0	0	80807	0
5343_CDS.fasta	123	748	92004	5898	6.411	503	0.672	401	0.536	0.577	0.423	24167	15981	20410	25548	0	0	0	0	0	0	0	0	0	0	0	0	0	5898	0
5347_CDS.fasta	118	273	32214	9434	29.285	182	0.667	148	0.542	0.538	0.462	5482	3681	6847	6770	0	0	0	0	0	0	0	0	0	0	0	0	0	9434	0
5348_CDS.fasta	103	621	63963	28893	45.171	413	0.665	293	0.472	0.577	0.423	10615	6634	8216	9605	0	0	0	0	0	0	0	0	0	0	0	0	0	28893	0
5354_CDS.fasta	96	436	41856	21224	50.707	276	0.633	154	0.353	0.58	0.42	5096	4259	4409	6868	0	0	0	0	0	0	0	0	0	0	0	0	0	21224	0
5355_CDS.fasta	124	621	77004	34497	44.799	418	0.673	293	0.472	0.553	0.447	12445	7197	11710	11155	0	0	0	0	0	0	0	0	0	0	0	0	0	34497	0
5357_CDS.fasta	121	350	42350	12708	30.007	261	0.746	174	0.497	0.573	0.427	7595	5839	6906	9302	0	0	0	0	0	0	0	0	0	0	0	0	0	12708	0
5366_CDS.fasta	124	1275	158100	39894	25.233	1013	0.795	772	0.605	0.546	0.454	32163	21957	31756	32330	0	0	0	0	0	0	0	0	0	0	0	0	0	39894	0
5398_CDS.fasta	124	1876	232624	22677	9.748	1248	0.665	950	0.506	0.586	0.414	67707	38886	47979	55375	0	0	0	0	0	0	0	0	0	0	0	0	0	22677	0
5404_CDS.fasta	119	1403	166957	50427	30.204	984	0.701	738	0.526	0.582	0.418	30376	23693	24973	37488	0	0	0	0	0	0	0	0	0	0	0	0	0	50427	0
5406_CDS.fasta	124	1731	214644	23715	11.049	1108	0.64	818	0.473	0.573	0.427	50547	34501	47077	58804	0	0	0	0	0	0	0	0	0	0	0	0	0	23715	0
5421_CDS.fasta	124	1322	163928	40738	24.851	1013	0.766	789	0.597	0.571	0.429	34502	20339	32795	35554	0	0	0	0	0	0	0	0	0	0	0	0	0	40738	0
5422_CDS.fasta	121	964	116644	35349	30.305	729	0.756	566	0.587	0.576	0.424	23246	15102	19419	23528	0	0	0	0	0	0	0	0	0	0	0	0	0	35349	0
5426_CDS.fasta	124	1892	234608	54276	23.135	1314	0.695	990	0.523	0.575	0.425	49848	33165	43428	53891	0	0	0	0	0	0	0	0	0	0	0	0	0	54276	0
5427_CDS.fasta	124	858	106392	16429	15.442	710	0.828	529	0.617	0.608	0.392	33817	14345	20951	20850	0	0	0	0	0	0	0	0	0	0	0	0	0	16429	0
5428_CDS.fasta	122	735	89670	20729	23.117	460	0.626	343	0.467	0.537	0.463	18397	15342	16555	18647	0	0	0	0	0	0	0	0	0	0	0	0	0	20729	0
5430_CDS.fasta	123	792	97416	46732	47.972	509	0.643	327	0.413	0.6	0.4	17836	7869	12492	12487	0	0	0	0	0	0	0	0	0	0	0	0	0	46732	0
5434_CDS.fasta	110	1019	112090	46044	41.078	615	0.604	374	0.367	0.534	0.466	17668	13004	17120	18254	0	0	0	0	0	0	0	0	0	0	0	0	0	46044	0
5449_CDS.fasta	123	1284	157932	19075	12.078	978	0.762	768	0.598	0.548	0.452	39534	25567	37116	36640	0	0	0	0	0	0	0	0	0	0	0	0	0	19075	0
5454_CDS.fasta	124	1203	149172	20323	13.624	869	0.722	686	0.57	0.565	0.435	39690	20643	35412	33104	0	0	0	0	0	0	0	0	0	0	0	0	0	20323	0
5460_CDS.fasta	119	498	59262	13845	23.362	356	0.715	257	0.516	0.565	0.435	14663	7178	12593	10983	0	0	0	0	0	0	0	0	0	0	0	0	0	13845	0
5463_CDS.fasta	120	500	60000	12383	20.638	288	0.576	223	0.446	0.578	0.422	17474	7312	12845	9986	0	0	0	0	0	0	0	0	0	0	0	0	0	12383	0
5464_CDS.fasta	121	1119	135399	49824	36.798	834	0.745	599	0.535	0.574	0.426	25706	16169	20123	23577	0	0	0	0	0	0	0	0	0	0	0	0	0	49824	0
5469_CDS.fasta	122	738	90036	21250	23.602	539	0.73	400	0.542	0.57	0.43	18892	12825	16777	20292	0	0	0	0	0	0	0	0	0	0	0	0	0	21250	0
5477_CDS.fasta	114	540	61560	19311	31.369	382	0.707	291	0.539	0.579	0.421	11883	8069	9723	12574	0	0	0	0	0	0	0	0	0	0	0	0	0	19311	0
5489_CDS.fasta	120	1247	149640	69700	46.578	963	0.772	726	0.582	0.574	0.426	25783	12735	21498	19924	0	0	0	0	0	0	0	0	0	0	0	0	0	69700	0
5502_CDS.fasta	124	1101	136524	18949	13.88	822	0.747	645	0.586	0.541	0.459	32840	24016	29987	30732	0	0	0	0	0	0	0	0	0	0	0	0	0	18949	0
5513_CDS.fasta	120	1049	125880	47944	38.087	842	0.803	663	0.632	0.549	0.451	20179	16630	18577	22550	0	0	0	0	0	0	0	0	0	0	0	0	0	47944	0
5528_CDS.fasta	123	1477	181671	45269	24.918	1075	0.728	861	0.583	0.587	0.413	40709	24726	31708	39259	0	0	0	0	0	0	0	0	0	0	0	0	0	45269	0
5531_CDS.fasta	122	469	57218	17377	30.37	358	0.763	275	0.586	0.577	0.423	11096	7240	9648	11857	0	0	0	0	0	0	0	0	0	0	0	0	0	17377	0
5536_CDS.fasta	116	454	52664	11460	21.761	305	0.672	228	0.502	0.576	0.424	12705	7729	9734	11036	0	0	0	0	0	0	0	0	0	0	0	0	0	11460	0
5551_CDS.fasta	115	991	113965	34610	30.369	737	0.744	514	0.519	0.586	0.414	24190	14347	18477	22341	0	0	0	0	0	0	0	0	0	0	0	0	0	34610	0
5554_CDS.fasta	122	1154	140788	28789	20.448	875	0.758	648	0.562	0.552	0.448	35912	21551	28702	25834	0	0	0	0	0	0	0	0	0	0	0	0	0	28789	0
5562_CDS.fasta	114	308	35112	10994	31.311	235	0.763	151	0.49	0.499	0.501	6632	5878	6248	5360	0	0	0	0	0	0	0	0	0	0	0	0	0	10994	0
5578_CDS.fasta	112	219	24528	2894	11.799	165	0.753	128	0.584	0.554	0.446	6994	3876	5781	4983	0	0	0	0	0	0	0	0	0	0	0	0	0	2894	0
5594_CDS.fasta	123	818	100614	19760	19.639	535	0.654	448	0.548	0.534	0.466	23112	14240	23441	20061	0	0	0	0	0	0	0	0	0	0	0	0	0	19760	0
5596_CDS.fasta	124	3836	475664	96040	20.191	2821	0.735	2205	0.575	0.577	0.423	99898	73924	86636	119166	0	0	0	0	0	0	0	0	0	0	0	0	0	96040	0
5599_CDS.fasta	124	2094	259656	40550	15.617	1441	0.688	1078	0.515	0.552	0.448	60155	44921	53242	60788	0	0	0	0	0	0	0	0	0	0	0	0	0	40550	0
5614_CDS.fasta	124	2481	307644	33215	10.797	1997	0.805	1612	0.65	0.555	0.445	75687	52151	69954	76637	0	0	0	0	0	0	0	0	0	0	0	0	0	33215	0
5620_CDS.fasta	124	1443	178932	24241	13.548	1121	0.777	939	0.651	0.559	0.441	44957	22830	45332	41572	0	0	0	0	0	0	0	0	0	0	0	0	0	24241	0
5634_CDS.fasta	121	1180	142780	60818	42.596	849	0.719	619	0.525	0.551	0.449	23110	16202	20557	22093	0	0	0	0	0	0	0	0	0	0	0	0	0	60818	0
5639_CDS.fasta	123	967	118941	17179	14.443	720	0.745	535	0.553	0.572	0.428	28525	18689	24839	29709	0	0	0	0	0	0	0	0	0	0	0	0	0	17179	0
5642_CDS.fasta	69	648	44712	30169	67.474	393	0.606	209	0.323	0.594	0.406	4301	2867	3116	4259	0	0	0	0	0	0	0	0	0	0	0	0	0	30169	0
5644_CDS.fasta	122	912	111264	25955	23.327	732	0.803	552	0.605	0.571	0.429	22263	17180	19479	26387	0	0	0	0	0	0	0	0	0	0	0	0	0	25955	0
5656_CDS.fasta	109	516	56244	28980	51.525	315	0.61	212	0.411	0.585	0.415	7642	5024	6606	7992	0	0	0	0	0	0	0	0	0	0	0	0	0	28980	0
5660_CDS.fasta	121	972	117612	46958	39.926	582	0.599	440	0.453	0.544	0.456	18536	14061	18064	19993	0	0	0	0	0	0	0	0	0	0	0	0	0	46958	0
5664_CDS.fasta	122	993	121146	8628	7.122	746	0.751	582	0.586	0.559	0.441	30922	17805	31790	32001	0	0	0	0	0	0	0	0	0	0	0	0	0	8628	0
5670_CDS.fasta	119	993	118167	15809	13.379	709	0.714	529	0.533	0.571	0.429	30356	17856	26049	28097	0	0	0	0	0	0	0	0	0	0	0	0	0	15809	0
5699_CDS.fasta	120	606	72720	28473	39.154	485	0.8	339	0.559	0.583	0.417	12254	8769	9711	13513	0	0	0	0	0	0	0	0	0	0	0	0	0	28473	0
5702_CDS.fasta	124	864	107136	23302	21.75	632	0.731	511	0.591	0.574	0.426	25161	13153	22548	22972	0	0	0	0	0	0	0	0	0	0	0	0	0	23302	0
5703_CDS.fasta	106	1293	137058	76150	55.56	909	0.703	628	0.486	0.58	0.42	14695	14257	11547	20409	0	0	0	0	0	0	0	0	0	0	0	0	0	76150	0
5716_CDS.fasta	121	2186	264506	93621	35.395	1729	0.791	1288	0.589	0.562	0.438	50575	30610	44098	45602	0	0	0	0	0	0	0	0	0	0	0	0	0	93621	0
5721_CDS.fasta	121	948	114708	37004	32.259	597	0.63	386	0.407	0.546	0.454	19526	14579	20691	22908	0	0	0	0	0	0	0	0	0	0	0	0	0	37004	0
5733_CDS.fasta	115	739	84985	47156	55.487	466	0.631	328	0.444	0.562	0.438	9821	7068	9546	11394	0	0	0	0	0	0	0	0	0	0	0	0	0	47156	0
5744_CDS.fasta	121	561	67881	13955	20.558	427	0.761	356	0.635	0.543	0.457	15029	10880	13730	14287	0	0	0	0	0	0	0	0	0	0	0	0	0	13955	0
5770_CDS.fasta	121	1368	165528	30918	18.678	1092	0.798	826	0.604	0.589	0.411	44663	22538	32751	34658	0	0	0	0	0	0	0	0	0	0	0	0	0	30918	0
5772_CDS.fasta	121	840	101640	24103	23.714	698	0.831	582	0.693	0.539	0.461	21352	15484	20090	20611	0	0	0	0	0	0	0	0	0	0	0	0	0	24103	0
5791_CDS.fasta	118	742	87556	27398	31.292	513	0.691	407	0.549	0.581	0.419	17670	10510	14736	17242	0	0	0	0	0	0	0	0	0	0	0	0	0	27398	0
5802_CDS.fasta	124	660	81840	25985	31.751	514	0.779	387	0.586	0.564	0.436	14983	12148	12052	16672	0	0	0	0	0	0	0	0	0	0	0	0	0	25985	0
5815_CDS.fasta	118	756	89208	24545	27.514	473	0.626	377	0.499	0.52	0.48	16196	13190	17716	17561	0	0	0	0	0	0	0	0	0	0	0	0	0	24545	0
5816_CDS.fasta	115	1430	164450	54389	33.073	1078	0.754	826	0.578	0.566	0.434	27552	22661	25060	34788	0	0	0	0	0	0	0	0	0	0	0	0	0	54389	0
5821_CDS.fasta	119	834	99246	35279	35.547	648	0.777	482	0.578	0.581	0.419	18449	11229	15585	18704	0	0	0	0	0	0	0	0	0	0	0	0	0	35279	0
5822_CDS.fasta	116	793	91988	23020	25.025	634	0.799	516	0.651	0.55	0.45	20488	13540	17358	17582	0	0	0	0	0	0	0	0	0	0	0	0	0	23020	0
5840_CDS.fasta	124	814	100936	12857	12.738	535	0.657	408	0.501	0.557	0.443	25227	18222	20773	23857	0	0	0	0	0	0	0	0	0	0	0	0	0	12857	0
5841_CDS.fasta	116	899	104284	29414	28.206	646	0.719	489	0.544	0.549	0.451	19096	16125	17614	22035	0	0	0	0	0	0	0	0	0	0	0	0	0	29414	0
5842_CDS.fasta	124	1209	149916	61804	41.226	932	0.771	684	0.566	0.562	0.438	24114	17570	21062	25366	0	0	0	0	0	0	0	0	0	0	0	0	0	61804	0
5843_CDS.fasta	119	598	71162	30869	43.378	475	0.794	359	0.6	0.55	0.45	10294	8142	10131	11726	0	0	0	0	0	0	0	0	0	0	0	0	0	30869	0
5849_CDS.fasta	111	521	57831	13633	23.574	352	0.676	253	0.486	0.578	0.422	11757	7923	10703	13815	0	0	0	0	0	0	0	0	0	0	0	0	0	13633	0
5853_CDS.fasta	122	647	78934	4663	5.907	482	0.745	376	0.581	0.586	0.414	27047	11124	19595	16505	0	0	0	0	0	0	0	0	0	0	0	0	0	4663	0
5857_CDS.fasta	121	852	103092	24894	24.147	639	0.75	447	0.525	0.521	0.479	22043	16206	21482	18467	0	0	0	0	0	0	0	0	0	0	0	0	0	24894	0
5858_CDS.fasta	123	1163	143049	60763	42.477	874	0.752	645	0.555	0.548	0.452	25827	16404	20996	19059	0	0	0	0	0	0	0	0	0	0	0	0	0	60763	0
5859_CDS.fasta	121	810	98010	18659	19.038	630	0.778	519	0.641	0.518	0.482	18658	18561	19659	22473	0	0	0	0	0	0	0	0	0	0	0	0	0	18659	0
5865_CDS.fasta	124	1491	184884	39021	21.106	1167	0.783	900	0.604	0.583	0.417	42906	24777	36009	42171	0	0	0	0	0	0	0	0	0	0	0	0	0	39021	0
5866_CDS.fasta	123	792	97416	33099	33.977	553	0.698	410	0.518	0.571	0.429	19311	10756	16807	17443	0	0	0	0	0	0	0	0	0	0	0	0	0	33099	0
5870_CDS.fasta	121	661	79981	25170	31.47	477	0.722	392	0.593	0.598	0.402	12644	11318	10636	20213	0	0	0	0	0	0	0	0	0	0	0	0	0	25170	0
5893_CDS.fasta	101	735	74235	27261	36.723	552	0.751	426	0.58	0.526	0.474	11692	13458	8934	12890	0	0	0	0	0	0	0	0	0	0	0	0	0	27261	0
5894_CDS.fasta	101	411	41511	20999	50.587	314	0.764	216	0.526	0.606	0.394	6582	3596	4576	5758	0	0	0	0	0	0	0	0	0	0	0	0	0	20999	0
5899_CDS.fasta	120	2094	251280	97760	38.905	1642	0.784	1262	0.603	0.582	0.418	42707	29190	35361	46262	0	0	0	0	0	0	0	0	0	0	0	0	0	97760	0
5910_CDS.fasta	123	720	88560	5805	6.555	477	0.662	394	0.547	0.545	0.455	23577	13628	23991	21559	0	0	0	0	0	0	0	0	0	0	0	0	0	5805	0
5913_CDS.fasta	124	1275	158100	26102	16.51	964	0.756	711	0.558	0.557	0.443	36325	27878	30502	37293	0	0	0	0	0	0	0	0	0	0	0	0	0	26102	0
5918_CDS.fasta	118	705	83190	23096	27.763	579	0.821	439	0.623	0.549	0.451	17455	10906	15954	15779	0	0	0	0	0	0	0	0	0	0	0	0	0	23096	0
5919_CDS.fasta	122	582	71004	13954	19.652	401	0.689	303	0.521	0.564	0.436	16866	9507	15392	15285	0	0	0	0	0	0	0	0	0	0	0	0	0	13954	0
5921_CDS.fasta	123	3741	460143	65873	14.316	2919	0.78	2249	0.601	0.591	0.409	136097	64321	96673	97179	0	0	0	0	0	0	0	0	0	0	0	0	0	65873	0
5922_CDS.fasta	124	1470	182280	19536	10.718	1018	0.693	795	0.541	0.557	0.443	46169	29884	42154	44537	0	0	0	0	0	0	0	0	0	0	0	0	0	19536	0
5926_CDS.fasta	122	752	91744	27449	29.919	541	0.719	397	0.528	0.564	0.436	17249	11707	16391	18948	0	0	0	0	0	0	0	0	0	0	0	0	0	27449	0
5933_CDS.fasta	122	1215	148230	29028	19.583	895	0.737	702	0.578	0.527	0.473	30992	26601	29828	31781	0	0	0	0	0	0	0	0	0	0	0	0	0	29028	0
5936_CDS.fasta	117	486	56862	19120	33.625	329	0.677	230	0.473	0.515	0.485	9178	6719	11677	10168	0	0	0	0	0	0	0	0	0	0	0	0	0	19120	0
5940_CDS.fasta	124	915	113460	15715	13.851	696	0.761	531	0.58	0.614	0.386	22780	20631	17197	37137	0	0	0	0	0	0	0	0	0	0	0	0	0	15715	0
5941_CDS.fasta	105	423	44415	12644	28.468	308	0.728	209	0.494	0.547	0.453	9488	6565	7880	7838	0	0	0	0	0	0	0	0	0	0	0	0	0	12644	0
5942_CDS.fasta	115	846	97290	26082	26.809	593	0.701	471	0.557	0.518	0.482	19054	17253	17573	17328	0	0	0	0	0	0	0	0	0	0	0	0	0	26082	0
5943_CDS.fasta	123	1745	214635	46169	21.51	1324	0.759	962	0.551	0.573	0.427	46733	31665	40304	49764	0	0	0	0	0	0	0	0	0	0	0	0	0	46169	0
5944_CDS.fasta	124	885	109740	37182	33.882	612	0.692	440	0.497	0.565	0.435	20510	15061	16548	20439	0	0	0	0	0	0	0	0	0	0	0	0	0	37182	0
5945_CDS.fasta	117	810	94770	15060	15.891	516	0.637	405	0.5	0.558	0.442	25467	14772	20340	19131	0	0	0	0	0	0	0	0	0	0	0	0	0	15060	0
5949_CDS.fasta	123	545	67035	10800	16.111	387	0.71	313	0.574	0.563	0.437	16334	11510	13070	15321	0	0	0	0	0	0	0	0	0	0	0	0	0	10800	0
5950_CDS.fasta	122	721	87962	12722	14.463	526	0.73	391	0.542	0.586	0.414	22390	14620	16543	21687	0	0	0	0	0	0	0	0	0	0	0	0	0	12722	0
5958_CDS.fasta	121	480	58080	10793	18.583	321	0.669	259	0.54	0.551	0.449	14007	9177	11920	12183	0	0	0	0	0	0	0	0	0	0	0	0	0	10793	0
5960_CDS.fasta	123	1400	172200	57773	33.55	1105	0.789	788	0.563	0.566	0.434	31559	20990	28646	33232	0	0	0	0	0	0	0	0	0	0	0	0	0	57773	0
5968_CDS.fasta	120	426	51120	20341	39.791	281	0.66	199	0.467	0.541	0.459	8009	5916	8307	8547	0	0	0	0	0	0	0	0	0	0	0	0	0	20341	0
5974_CDS.fasta	120	726	87120	15874	18.221	478	0.658	361	0.497	0.584	0.416	21541	13304	16318	20083	0	0	0	0	0	0	0	0	0	0	0	0	0	15874	0
5977_CDS.fasta	118	667	78706	24933	31.679	505	0.757	392	0.588	0.582	0.418	15337	10730	11732	15974	0	0	0	0	0	0	0	0	0	0	0	0	0	24933	0
5980_CDS.fasta	110	657	72270	22878	31.656	466	0.709	323	0.492	0.564	0.436	13754	9123	12407	14108	0	0	0	0	0	0	0	0	0	0	0	0	0	22878	0
5981_CDS.fasta	123	1149	141327	25293	17.897	890	0.775	721	0.628	0.562	0.438	30699	23894	26833	34608	0	0	0	0	0	0	0	0	0	0	0	0	0	25293	0
5990_CDS.fasta	113	435	49155	3270	6.652	343	0.789	274	0.63	0.544	0.456	14553	9880	11035	10417	0	0	0	0	0	0	0	0	0	0	0	0	0	3270	0
6000_CDS.fasta	119	707	84133	23338	27.739	432	0.611	297	0.42	0.577	0.423	17098	9956	15729	18012	0	0	0	0	0	0	0	0	0	0	0	0	0	23338	0
6003_CDS.fasta	123	237	29151	1103	3.784	125	0.527	96	0.405	0.577	0.423	10051	4833	7018	6146	0	0	0	0	0	0	0	0	0	0	0	0	0	1103	0
6004_CDS.fasta	122	933	113826	20194	17.741	715	0.766	588	0.63	0.558	0.442	26661	16001	25362	25608	0	0	0	0	0	0	0	0	0	0	0	0	0	20194	0
6016_CDS.fasta	124	1511	187364	61476	32.811	1009	0.668	793	0.525	0.533	0.467	24198	25749	33167	42774	0	0	0	0	0	0	0	0	0	0	0	0	0	61476	0
6026_CDS.fasta	124	951	117924	26791	22.719	689	0.725	512	0.538	0.544	0.456	26017	17631	23955	23530	0	0	0	0	0	0	0	0	0	0	0	0	0	26791	0
6029_CDS.fasta	118	900	106200	31320	29.492	666	0.74	468	0.52	0.565	0.435	20505	13606	18932	21837	0	0	0	0	0	0	0	0	0	0	0	0	0	31320	0
6034_CDS.fasta	124	593	73532	18549	25.226	435	0.734	338	0.57	0.576	0.424	15125	9126	14065	16667	0	0	0	0	0	0	0	0	0	0	0	0	0	18549	0
6036_CDS.fasta	123	1437	176751	24239	13.714	1071	0.745	772	0.537	0.565	0.435	48225	26397	39865	38025	0	0	0	0	0	0	0	0	0	0	0	0	0	24239	0
6038_CDS.fasta	124	1221	151404	41085	27.136	876	0.717	646	0.529	0.536	0.464	29851	19919	31212	29337	0	0	0	0	0	0	0	0	0	0	0	0	0	41085	0
6041_CDS.fasta	123	1983	243909	85503	35.055	1489	0.751	1130	0.57	0.581	0.419	42949	31393	35306	48758	0	0	0	0	0	0	0	0	0	0	0	0	0	85503	0
6048_CDS.fasta	114	387	44118	11498	26.062	280	0.724	187	0.483	0.574	0.426	10297	5943	7985	8395	0	0	0	0	0	0	0	0	0	0	0	0	0	11498	0
6050_CDS.fasta	110	1136	124960	39466	31.583	733	0.645	528	0.465	0.584	0.416	25458	16474	19357	24205	0	0	0	0	0	0	0	0	0	0	0	0	0	39466	0
6051_CDS.fasta	123	1243	152889	18253	11.939	915	0.736	711	0.572	0.519	0.481	31603	29367	35454	38212	0	0	0	0	0	0	0	0	0	0	0	0	0	18253	0
6056_CDS.fasta	110	1028	113080	51646	45.672	832	0.809	633	0.616	0.554	0.446	16509	12335	14882	17708	0	0	0	0	0	0	0	0	0	0	0	0	0	51646	0
6064_CDS.fasta	77	832	64064	26804	41.839	593	0.713	396	0.476	0.588	0.412	10659	6802	8613	11186	0	0	0	0	0	0	0	0	0	0	0	0	0	26804	0
6068_CDS.fasta	121	252	30492	1393	4.568	188	0.746	146	0.579	0.543	0.457	9724	6977	6303	6095	0	0	0	0	0	0	0	0	0	0	0	0	0	1393	0
6072_CDS.fasta	116	447	51852	11434	22.051	342	0.765	280	0.626	0.561	0.439	11941	6189	11549	10739	0	0	0	0	0	0	0	0	0	0	0	0	0	11434	0
6098_CDS.fasta	124	2073	257052	36333	14.134	1445	0.697	1142	0.551	0.559	0.441	64206	45934	51551	59028	0	0	0	0	0	0	0	0	0	0	0	0	0	36333	0
6110_CDS.fasta	124	567	70308	10743	15.28	457	0.806	352	0.621	0.566	0.434	17874	10830	15182	15679	0	0	0	0	0	0	0	0	0	0	0	0	0	10743	0
6114_CDS.fasta	119	555	66045	21706	32.865	425	0.766	328	0.591	0.552	0.448	13472	8958	10826	11083	0	0	0	0	0	0	0	0	0	0	0	0	0	21706	0
6119_CDS.fasta	124	2475	306900	54219	17.667	1918	0.775	1505	0.608	0.577	0.423	72039	46254	60661	73727	0	0	0	0	0	0	0	0	0	0	0	0	0	54219	0
6128_CDS.fasta	121	783	94743	30662	32.363	635	0.811	491	0.627	0.555	0.445	24333	9070	19372	11306	0	0	0	0	0	0	0	0	0	0	0	0	0	30662	0
6130_CDS.fasta	121	537	64977	16511	25.411	373	0.695	269	0.501	0.577	0.423	13635	9316	11154	14361	0	0	0	0	0	0	0	0	0	0	0	0	0	16511	0
6139_CDS.fasta	121	933	112893	5869	5.199	592	0.635	453	0.486	0.558	0.442	29160	20419	26908	30537	0	0	0	0	0	0	0	0	0	0	0	0	0	5869	0
6148_CDS.fasta	117	618	72306	22841	31.589	469	0.759	365	0.591	0.563	0.437	14044	8892	12755	13774	0	0	0	0	0	0	0	0	0	0	0	0	0	22841	0
6150_CDS.fasta	102	694	70788	24739	34.948	505	0.728	382	0.55	0.552	0.448	12512	9215	11364	12958	0	0	0	0	0	0	0	0	0	0	0	0	0	24739	0
6164_CDS.fasta	87	351	30537	5565	18.224	232	0.661	189	0.538	0.566	0.434	7047	5653	5279	6993	0	0	0	0	0	0	0	0	0	0	0	0	0	5565	0
6175_CDS.fasta	122	1578	192516	57985	30.12	1228	0.778	972	0.616	0.573	0.427	40817	25383	31444	36887	0	0	0	0	0	0	0	0	0	0	0	0	0	57985	0
6176_CDS.fasta	124	1559	193316	31484	16.286	1159	0.743	925	0.593	0.549	0.451	42648	31187	41921	46076	0	0	0	0	0	0	0	0	0	0	0	0	0	31484	0
6198_CDS.fasta	121	467	56507	15702	27.788	313	0.67	224	0.48	0.548	0.452	13855	6699	11784	8467	0	0	0	0	0	0	0	0	0	0	0	0	0	15702	0
6216_CDS.fasta	118	935	110330	36078	32.7	714	0.764	522	0.558	0.553	0.447	20193	15400	17600	21059	0	0	0	0	0	0	0	0	0	0	0	0	0	36078	0
6221_CDS.fasta	118	711	83898	11702	13.948	555	0.781	439	0.617	0.573	0.427	20479	14994	15829	20894	0	0	0	0	0	0	0	0	0	0	0	0	0	11702	0
6226_CDS.fasta	124	1147	142228	59077	41.537	841	0.733	641	0.559	0.561	0.439	22321	13881	22441	24508	0	0	0	0	0	0	0	0	0	0	0	0	0	59077	0
6227_CDS.fasta	121	622	75262	26825	35.642	429	0.69	318	0.511	0.5	0.5	12711	10140	13898	11688	0	0	0	0	0	0	0	0	0	0	0	0	0	26825	0
6238_CDS.fasta	124	1434	177816	52818	29.704	1055	0.736	826	0.576	0.547	0.453	33356	28125	28450	35067	0	0	0	0	0	0	0	0	0	0	0	0	0	52818	0
6258_CDS.fasta	119	902	107338	33562	31.268	584	0.647	448	0.497	0.586	0.414	16845	14200	16166	26565	0	0	0	0	0	0	0	0	0	0	0	0	0	33562	0
6265_CDS.fasta	124	600	74400	26706	35.895	440	0.733	333	0.555	0.57	0.43	13835	7876	12497	13486	0	0	0	0	0	0	0	0	0	0	0	0	0	26706	0
6270_CDS.fasta	113	330	37290	6639	17.804	236	0.715	186	0.564	0.599	0.401	9578	4743	7568	8762	0	0	0	0	0	0	0	0	0	0	0	0	0	6639	0
6274_CDS.fasta	121	723	87483	20822	23.801	507	0.701	400	0.553	0.575	0.425	20317	11168	17135	18041	0	0	0	0	0	0	0	0	0	0	0	0	0	20822	0
6282_CDS.fasta	119	477	56763	5824	10.26	337	0.706	259	0.543	0.559	0.441	14383	8346	14174	14036	0	0	0	0	0	0	0	0	0	0	0	0	0	5824	0
6284_CDS.fasta	124	1302	161448	26546	16.442	938	0.72	759	0.583	0.532	0.468	26930	31892	31248	44832	0	0	0	0	0	0	0	0	0	0	0	0	0	26546	0
6295_CDS.fasta	123	1435	176505	27757	15.726	870	0.606	635	0.443	0.567	0.433	42314	30734	33714	41986	0	0	0	0	0	0	0	0	0	0	0	0	0	27757	0
6298_CDS.fasta	120	522	62640	9762	15.584	376	0.72	226	0.433	0.565	0.435	15365	9934	13028	14551	0	0	0	0	0	0	0	0	0	0	0	0	0	9762	0
6299_CDS.fasta	108	608	65664	24165	36.801	452	0.743	354	0.582	0.531	0.469	10574	10341	9563	11021	0	0	0	0	0	0	0	0	0	0	0	0	0	24165	0
6303_CDS.fasta	124	675	83700	11332	13.539	490	0.726	378	0.56	0.58	0.42	18579	12714	17757	23318	0	0	0	0	0	0	0	0	0	0	0	0	0	11332	0
6318_CDS.fasta	120	1806	216720	39300	18.134	1279	0.708	1009	0.559	0.578	0.422	50232	30036	44693	52459	0	0	0	0	0	0	0	0	0	0	0	0	0	39300	0
6320_CDS.fasta	124	1644	203856	33744	16.553	1229	0.748	887	0.54	0.56	0.44	49388	29448	45339	45937	0	0	0	0	0	0	0	0	0	0	0	0	0	33744	0
6363_CDS.fasta	123	1272	156456	33719	21.552	1012	0.796	808	0.635	0.567	0.433	35065	21657	31468	34547	0	0	0	0	0	0	0	0	0	0	0	0	0	33719	0
6366_CDS.fasta	115	2006	230690	121065	52.48	1490	0.743	1074	0.535	0.575	0.425	31006	19858	26348	32413	0	0	0	0	0	0	0	0	0	0	0	0	0	121065	0
6373_CDS.fasta	122	843	102846	13674	13.296	588	0.698	467	0.554	0.55	0.45	26470	15651	24470	22581	0	0	0	0	0	0	0	0	0	0	0	0	0	13674	0
6376_CDS.fasta	119	691	82229	29413	35.77	454	0.657	297	0.43	0.54	0.46	14058	9339	14781	14638	0	0	0	0	0	0	0	0	0	0	0	0	0	29413	0
6378_CDS.fasta	114	1005	114570	35277	30.791	714	0.71	488	0.486	0.567	0.433	23361	15024	19296	21612	0	0	0	0	0	0	0	0	0	0	0	0	0	35277	0
6379_CDS.fasta	109	447	48723	18223	37.401	363	0.812	268	0.6	0.54	0.46	7977	7270	6773	8480	0	0	0	0	0	0	0	0	0	0	0	0	0	18223	0
6383_CDS.fasta	123	1645	202335	107623	53.191	1182	0.719	853	0.519	0.584	0.416	29987	15447	24058	25220	0	0	0	0	0	0	0	0	0	0	0	0	0	107623	0
6384_CDS.fasta	122	983	119926	35756	29.815	814	0.828	651	0.662	0.557	0.443	24068	17184	20075	22843	0	0	0	0	0	0	0	0	0	0	0	0	0	35756	0
6387_CDS.fasta	123	1020	125460	23463	18.702	643	0.63	462	0.453	0.553	0.447	23562	19349	26235	32851	0	0	0	0	0	0	0	0	0	0	0	0	0	23463	0
6389_CDS.fasta	124	1170	145080	26663	18.378	777	0.664	586	0.501	0.556	0.444	31434	24293	28306	34384	0	0	0	0	0	0	0	0	0	0	0	0	0	26663	0
6393_CDS.fasta	121	813	98373	21494	21.849	644	0.792	490	0.603	0.567	0.433	20213	15449	17918	23299	0	0	0	0	0	0	0	0	0	0	0	0	0	21494	0
6398_CDS.fasta	118	377	44486	17183	38.626	311	0.825	225	0.597	0.582	0.418	7986	4667	6718	7932	0	0	0	0	0	0	0	0	0	0	0	0	0	17183	0
6401_CDS.fasta	118	569	67142	3203	4.77	445	0.782	349	0.613	0.568	0.432	17755	11513	16067	18604	0	0	0	0	0	0	0	0	0	0	0	0	0	3203	0
6404_CDS.fasta	118	552	65136	17571	26.976	396	0.717	306	0.554	0.547	0.453	11195	8367	13205	14798	0	0	0	0	0	0	0	0	0	0	0	0	0	17571	0
6405_CDS.fasta	122	1353	165066	43507	26.357	985	0.728	741	0.548	0.543	0.457	35406	28598	27209	30346	0	0	0	0	0	0	0	0	0	0	0	0	0	43507	0
6406_CDS.fasta	112	680	76160	45451	59.678	486	0.715	310	0.456	0.579	0.421	8409	6819	6100	9381	0	0	0	0	0	0	0	0	0	0	0	0	0	45451	0
6407_CDS.fasta	116	406	47096	22464	47.698	304	0.749	216	0.532	0.545	0.455	7588	4508	6770	5766	0	0	0	0	0	0	0	0	0	0	0	0	0	22464	0
6412_CDS.fasta	124	598	74152	3305	4.457	425	0.711	337	0.564	0.551	0.449	20239	15277	16515	18816	0	0	0	0	0	0	0	0	0	0	0	0	0	3305	0
6420_CDS.fasta	124	717	88908	11058	12.438	533	0.743	393	0.548	0.553	0.447	18569	15155	19620	24506	0	0	0	0	0	0	0	0	0	0	0	0	0	11058	0
6430_CDS.fasta	50	192	9600	4599	47.906	87	0.453	46	0.24	0.579	0.421	1128	793	1304	1776	0	0	0	0	0	0	0	0	0	0	0	0	0	4599	0
6432_CDS.fasta	124	547	67828	19124	28.195	347	0.634	256	0.468	0.565	0.435	11855	10708	10505	15636	0	0	0	0	0	0	0	0	0	0	0	0	0	19124	0
6439_CDS.fasta	122	672	81984	23998	29.272	445	0.662	343	0.51	0.578	0.422	16552	9297	15148	16989	0	0	0	0	0	0	0	0	0	0	0	0	0	23998	0
6447_CDS.fasta	123	405	49815	7638	15.333	286	0.706	226	0.558	0.552	0.448	11981	8965	9900	11331	0	0	0	0	0	0	0	0	0	0	0	0	0	7638	0
6448_CDS.fasta	106	771	81726	29989	36.695	520	0.674	404	0.524	0.574	0.426	11682	10604	11456	17995	0	0	0	0	0	0	0	0	0	0	0	0	0	29989	0
6449_CDS.fasta	101	228	23028	1191	5.172	161	0.706	122	0.535	0.617	0.383	7586	3638	4740	5873	0	0	0	0	0	0	0	0	0	0	0	0	0	1191	0
6450_CDS.fasta	124	1569	194556	51594	26.519	1071	0.683	794	0.506	0.565	0.435	39383	27367	34872	41340	0	0	0	0	0	0	0	0	0	0	0	0	0	51594	0
6454_CDS.fasta	122	612	74664	16763	22.451	457	0.747	340	0.556	0.581	0.419	17067	11047	13243	16544	0	0	0	0	0	0	0	0	0	0	0	0	0	16763	0
6457_CDS.fasta	98	458	44884	21583	48.086	334	0.729	252	0.55	0.597	0.403	7466	3525	5796	6514	0	0	0	0	0	0	0	0	0	0	0	0	0	21583	0
6458_CDS.fasta	119	1260	149940	37787	25.201	882	0.7	611	0.485	0.571	0.429	32736	20839	27375	31203	0	0	0	0	0	0	0	0	0	0	0	0	0	37787	0
6459_CDS.fasta	123	762	93726	22329	23.824	585	0.768	444	0.583	0.536	0.464	16855	14588	18094	21860	0	0	0	0	0	0	0	0	0	0	0	0	0	22329	0
6460_CDS.fasta	123	909	111807	13668	12.225	683	0.751	557	0.613	0.564	0.436	27746	18494	24283	27616	0	0	0	0	0	0	0	0	0	0	0	0	0	13668	0
6462_CDS.fasta	121	762	92202	5024	5.449	519	0.681	385	0.505	0.574	0.426	26101	15495	21657	23925	0	0	0	0	0	0	0	0	0	0	0	0	0	5024	0
6483_CDS.fasta	123	692	85116	17885	21.013	517	0.747	381	0.551	0.566	0.434	19800	12815	16428	18188	0	0	0	0	0	0	0	0	0	0	0	0	0	17885	0
6487_CDS.fasta	124	1786	221464	23741	10.72	1150	0.644	887	0.497	0.538	0.462	53475	38382	52899	52967	0	0	0	0	0	0	0	0	0	0	0	0	0	23741	0
6488_CDS.fasta	120	1022	122640	60215	49.099	677	0.662	461	0.451	0.557	0.443	16922	10520	17252	17731	0	0	0	0	0	0	0	0	0	0	0	0	0	60215	0
6492_CDS.fasta	123	549	67527	7540	11.166	390	0.71	295	0.537	0.557	0.443	15723	10291	16285	17688	0	0	0	0	0	0	0	0	0	0	0	0	0	7540	0
6494_CDS.fasta	124	1325	164300	14849	9.038	923	0.697	748	0.565	0.561	0.439	39027	29141	36384	44899	0	0	0	0	0	0	0	0	0	0	0	0	0	14849	0
6496_CDS.fasta	119	960	114240	49648	43.459	639	0.666	422	0.44	0.563	0.437	19133	13119	15223	17117	0	0	0	0	0	0	0	0	0	0	0	0	0	49648	0
6498_CDS.fasta	114	285	32490	1699	5.229	230	0.807	203	0.712	0.513	0.487	7162	6821	8144	8664	0	0	0	0	0	0	0	0	0	0	0	0	0	1699	0
6500_CDS.fasta	124	1428	177072	9550	5.393	1013	0.709	722	0.506	0.558	0.442	47910	32501	41455	45656	0	0	0	0	0	0	0	0	0	0	0	0	0	9550	0
6506_CDS.fasta	117	559	65403	29680	45.38	416	0.744	277	0.496	0.549	0.451	9649	6845	9363	9866	0	0	0	0	0	0	0	0	0	0	0	0	0	29680	0
6507_CDS.fasta	118	357	42126	22778	54.071	255	0.714	180	0.504	0.594	0.406	5766	2849	5079	5654	0	0	0	0	0	0	0	0	0	0	0	0	0	22778	0
6514_CDS.fasta	5	275	1375	598	43.491	37	0.135	8	0.029	0.546	0.454	221	191	160	205	0	0	0	0	0	0	0	0	0	0	0	0	0	598	0
6526_CDS.fasta	95	356	33820	14270	42.194	232	0.652	166	0.466	0.56	0.44	6558	3572	5088	4332	0	0	0	0	0	0	0	0	0	0	0	0	0	14270	0
6527_CDS.fasta	124	1273	157852	36798	23.312	992	0.779	731	0.574	0.582	0.418	36067	20264	30228	34495	0	0	0	0	0	0	0	0	0	0	0	0	0	36798	0
6528_CDS.fasta	124	384	47616	2608	5.477	236	0.615	186	0.484	0.544	0.456	11965	8832	11656	12555	0	0	0	0	0	0	0	0	0	0	0	0	0	2608	0
6531_CDS.fasta	29	508	14732	4102	27.844	324	0.638	162	0.319	0.581	0.419	3254	1651	2802	2923	0	0	0	0	0	0	0	0	0	0	0	0	0	4102	0
6532_CDS.fasta	120	258	30960	4553	14.706	153	0.593	112	0.434	0.566	0.434	7972	3836	7653	6946	0	0	0	0	0	0	0	0	0	0	0	0	0	4553	0
6533_CDS.fasta	124	1124	139376	29863	21.426	757	0.673	551	0.49	0.563	0.437	29653	19249	28634	31977	0	0	0	0	0	0	0	0	0	0	0	0	0	29863	0
6538_CDS.fasta	122	588	71736	12067	16.821	439	0.747	289	0.491	0.551	0.449	17638	13677	13119	15235	0	0	0	0	0	0	0	0	0	0	0	0	0	12067	0
6540_CDS.fasta	123	369	45387	22607	49.809	296	0.802	218	0.591	0.532	0.468	4864	3907	6771	7238	0	0	0	0	0	0	0	0	0	0	0	0	0	22607	0
6544_CDS.fasta	121	2554	309034	189120	61.197	1996	0.782	1361	0.533	0.578	0.422	34633	22841	27936	34504	0	0	0	0	0	0	0	0	0	0	0	0	0	189120	0
6550_CDS.fasta	118	378	44604	10425	23.372	264	0.698	189	0.5	0.569	0.431	11284	5853	8892	8150	0	0	0	0	0	0	0	0	0	0	0	0	0	10425	0
6552_CDS.fasta	120	659	79080	24005	30.355	517	0.785	366	0.555	0.574	0.426	15066	10120	13305	16584	0	0	0	0	0	0	0	0	0	0	0	0	0	24005	0
6557_CDS.fasta	43	592	25456	16192	63.608	323	0.546	180	0.304	0.571	0.429	2440	2162	1844	2818	0	0	0	0	0	0	0	0	0	0	0	0	0	16192	0
6559_CDS.fasta	124	723	89652	17964	20.037	544	0.752	428	0.592	0.559	0.441	20187	12696	18929	19876	0	0	0	0	0	0	0	0	0	0	0	0	0	17964	0
6563_CDS.fasta	120	736	88320	20592	23.315	512	0.696	423	0.575	0.575	0.425	19085	12092	16679	19872	0	0	0	0	0	0	0	0	0	0	0	0	0	20592	0
6565_CDS.fasta	86	515	44290	24923	56.272	358	0.695	206	0.4	0.58	0.42	5626	3544	4622	5575	0	0	0	0	0	0	0	0	0	0	0	0	0	24923	0
6570_CDS.fasta	121	681	82401	16415	19.921	495	0.727	380	0.558	0.533	0.467	16036	13129	17647	19174	0	0	0	0	0	0	0	0	0	0	0	0	0	16415	0
6572_CDS.fasta	123	884	108732	36137	33.235	628	0.71	477	0.54	0.557	0.443	20917	13321	18935	19422	0	0	0	0	0	0	0	0	0	0	0	0	0	36137	0
6601_CDS.fasta	113	864	97632	37664	38.578	607	0.703	446	0.516	0.577	0.423	16999	11806	13583	17580	0	0	0	0	0	0	0	0	0	0	0	0	0	37664	0
6620_CDS.fasta	124	516	63984	1289	2.015	350	0.678	291	0.564	0.538	0.462	18522	11050	17927	15196	0	0	0	0	0	0	0	0	0	0	0	0	0	1289	0
6631_CDS.fasta	101	623	62923	30576	48.593	414	0.665	289	0.464	0.58	0.42	8155	6040	7483	10669	0	0	0	0	0	0	0	0	0	0	0	0	0	30576	0
6636_CDS.fasta	109	636	69324	12562	18.121	505	0.794	412	0.648	0.561	0.439	13241	12075	12803	18643	0	0	0	0	0	0	0	0	0	0	0	0	0	12562	0
6639_CDS.fasta	121	764	92444	31211	33.762	581	0.76	465	0.609	0.548	0.452	16212	11696	15919	17406	0	0	0	0	0	0	0	0	0	0	0	0	0	31211	0
6641_CDS.fasta	123	585	71955	11650	16.191	430	0.735	338	0.578	0.548	0.452	17438	12436	14898	15533	0	0	0	0	0	0	0	0	0	0	0	0	0	11650	0
6649_CDS.fasta	118	371	43778	9190	20.992	316	0.852	241	0.65	0.583	0.417	11930	5912	8469	8277	0	0	0	0	0	0	0	0	0	0	0	0	0	9190	0
6652_CDS.fasta	124	1416	175584	31710	18.06	1071	0.756	818	0.578	0.572	0.428	31778	30752	30815	50529	0	0	0	0	0	0	0	0	0	0	0	0	0	31710	0
6660_CDS.fasta	123	675	83025	10687	12.872	547	0.81	454	0.673	0.56	0.44	22124	12361	19433	18420	0	0	0	0	0	0	0	0	0	0	0	0	0	10687	0
6667_CDS.fasta	122	1002	122244	20156	16.488	719	0.718	512	0.511	0.569	0.431	29300	18592	25261	28935	0	0	0	0	0	0	0	0	0	0	0	0	0	20156	0
6679_CDS.fasta	107	754	80678	42505	52.685	536	0.711	370	0.491	0.549	0.451	9304	8066	9152	11651	0	0	0	0	0	0	0	0	0	0	0	0	0	42505	0
6685_CDS.fasta	124	857	106268	30067	28.294	565	0.659	394	0.46	0.564	0.436	20709	14150	19095	22247	0	0	0	0	0	0	0	0	0	0	0	0	0	30067	0
6689_CDS.fasta	123	819	100737	18002	17.87	585	0.714	404	0.493	0.563	0.437	21574	13378	22758	25025	0	0	0	0	0	0	0	0	0	0	0	0	0	18002	0
6705_CDS.fasta	102	321	32742	7461	22.787	239	0.745	176	0.548	0.425	0.575	6346	6511	7984	4440	0	0	0	0	0	0	0	0	0	0	0	0	0	7461	0
6713_CDS.fasta	106	508	53848	15940	29.602	407	0.801	310	0.61	0.606	0.394	8808	6930	8048	14122	0	0	0	0	0	0	0	0	0	0	0	0	0	15940	0
6717_CDS.fasta	124	1872	232128	40064	17.259	1376	0.735	1106	0.591	0.55	0.45	54515	28116	58227	51206	0	0	0	0	0	0	0	0	0	0	0	0	0	40064	0
6732_CDS.fasta	111	564	62604	21802	34.825	390	0.691	287	0.509	0.551	0.449	11541	8972	9268	11021	0	0	0	0	0	0	0	0	0	0	0	0	0	21802	0
6733_CDS.fasta	109	437	47633	25636	53.82	294	0.673	195	0.446	0.562	0.438	6390	3684	6152	5771	0	0	0	0	0	0	0	0	0	0	0	0	0	25636	0
6738_CDS.fasta	110	324	35640	7404	20.774	213	0.657	159	0.491	0.535	0.465	9810	5449	7732	5245	0	0	0	0	0	0	0	0	0	0	0	0	0	7404	0
6746_CDS.fasta	111	333	36963	19254	52.09	221	0.664	121	0.363	0.619	0.381	5440	2394	4453	5422	0	0	0	0	0	0	0	0	0	0	0	0	0	19254	0
6779_CDS.fasta	120	727	87240	9682	11.098	559	0.769	441	0.607	0.559	0.441	22289	15867	18335	21067	0	0	0	0	0	0	0	0	0	0	0	0	0	9682	0
6780_CDS.fasta	115	348	40020	4260	10.645	249	0.716	204	0.586	0.584	0.416	10822	4639	10196	10103	0	0	0	0	0	0	0	0	0	0	0	0	0	4260	0
6782_CDS.fasta	122	444	54168	4191	7.737	328	0.739	243	0.547	0.549	0.451	12120	8284	14293	15280	0	0	0	0	0	0	0	0	0	0	0	0	0	4191	0
6785_CDS.fasta	119	294	34986	10482	29.961	199	0.677	158	0.537	0.531	0.469	6655	4103	7366	6380	0	0	0	0	0	0	0	0	0	0	0	0	0	10482	0
6791_CDS.fasta	114	505	57570	20270	35.209	373	0.739	267	0.529	0.572	0.428	9645	8070	7855	11730	0	0	0	0	0	0	0	0	0	0	0	0	0	20270	0
6792_CDS.fasta	117	857	100269	38666	38.562	643	0.75	485	0.566	0.535	0.465	16516	12866	15564	16657	0	0	0	0	0	0	0	0	0	0	0	0	0	38666	0
6797_CDS.fasta	123	953	117219	16615	14.174	695	0.729	550	0.577	0.576	0.424	36558	17445	25183	21418	0	0	0	0	0	0	0	0	0	0	0	0	0	16615	0
6825_CDS.fasta	121	407	49247	7332	14.888	301	0.74	236	0.58	0.524	0.476	11040	7676	12330	10869	0	0	0	0	0	0	0	0	0	0	0	0	0	7332	0
6848_CDS.fasta	121	541	65461	18383	28.082	406	0.75	344	0.636	0.576	0.424	13540	9227	10795	13516	0	0	0	0	0	0	0	0	0	0	0	0	0	18383	0
6854_CDS.fasta	103	651	67053	27697	41.306	460	0.707	360	0.553	0.574	0.426	10705	7033	9788	11830	0	0	0	0	0	0	0	0	0	0	0	0	0	27697	0
6859_CDS.fasta	122	983	119926	21374	17.823	662	0.673	487	0.495	0.551	0.449	25602	19041	25203	28706	0	0	0	0	0	0	0	0	0	0	0	0	0	21374	0
6860_CDS.fasta	122	783	95526	24146	25.277	587	0.75	478	0.61	0.555	0.445	24395	11049	20805	15131	0	0	0	0	0	0	0	0	0	0	0	0	0	24146	0
6864_CDS.fasta	64	434	27776	16358	58.893	254	0.585	174	0.401	0.557	0.443	2919	2322	2712	3465	0	0	0	0	0	0	0	0	0	0	0	0	0	16358	0
6865_CDS.fasta	123	683	84009	23433	27.893	483	0.707	373	0.546	0.56	0.44	17977	11499	15117	15983	0	0	0	0	0	0	0	0	0	0	0	0	0	23433	0
6875_CDS.fasta	124	1293	160332	80567	50.25	749	0.579	575	0.445	0.551	0.449	21035	11235	24907	22588	0	0	0	0	0	0	0	0	0	0	0	0	0	80567	0
6882_CDS.fasta	120	750	90000	16377	18.197	607	0.809	508	0.677	0.531	0.469	22987	15233	19490	15913	0	0	0	0	0	0	0	0	0	0	0	0	0	16377	0
6883_CDS.fasta	122	492	60024	6536	10.889	281	0.571	200	0.407	0.566	0.434	15452	10259	12956	14821	0	0	0	0	0	0	0	0	0	0	0	0	0	6536	0
6886_CDS.fasta	60	192	11520	3589	31.155	131	0.682	80	0.417	0.553	0.447	2482	1917	1653	1879	0	0	0	0	0	0	0	0	0	0	0	0	0	3589	0
6893_CDS.fasta	107	378	40446	16035	39.645	266	0.704	201	0.532	0.548	0.452	7636	5724	5204	5847	0	0	0	0	0	0	0	0	0	0	0	0	0	16035	0
6909_CDS.fasta	120	677	81240	23101	28.435	466	0.688	325	0.48	0.561	0.439	16278	11552	14061	16248	0	0	0	0	0	0	0	0	0	0	0	0	0	23101	0
6913_CDS.fasta	124	951	117924	14342	12.162	629	0.661	471	0.495	0.561	0.439	29279	17930	27661	28712	0	0	0	0	0	0	0	0	0	0	0	0	0	14342	0
6914_CDS.fasta	122	729	88938	10699	12.03	551	0.756	432	0.593	0.565	0.435	21624	15057	18984	22574	0	0	0	0	0	0	0	0	0	0	0	0	0	10699	0
6924_CDS.fasta	124	1387	171988	31136	18.104	954	0.688	686	0.495	0.545	0.455	41975	26198	37971	34708	0	0	0	0	0	0	0	0	0	0	0	0	0	31136	0
6933_CDS.fasta	112	771	86352	30692	35.543	563	0.73	417	0.541	0.572	0.428	15038	11212	12559	16851	0	0	0	0	0	0	0	0	0	0	0	0	0	30692	0
6946_CDS.fasta	123	462	56826	15810	27.822	321	0.695	265	0.574	0.505	0.495	11924	8700	11447	8945	0	0	0	0	0	0	0	0	0	0	0	0	0	15810	0
6947_CDS.fasta	120	1953	234360	60651	25.879	1579	0.808	1225	0.627	0.58	0.42	48333	31144	41766	52466	0	0	0	0	0	0	0	0	0	0	0	0	0	60651	0
6954_CDS.fasta	124	666	82584	5745	6.957	461	0.692	372	0.559	0.551	0.449	20400	14412	20011	22016	0	0	0	0	0	0	0	0	0	0	0	0	0	5745	0
6955_CDS.fasta	121	471	56991	10553	18.517	301	0.639	242	0.514	0.582	0.418	11457	8585	10850	15546	0	0	0	0	0	0	0	0	0	0	0	0	0	10553	0
6958_CDS.fasta	117	636	74412	15756	21.174	452	0.711	319	0.502	0.57	0.43	15831	10424	14616	17785	0	0	0	0	0	0	0	0	0	0	0	0	0	15756	0
6961_CDS.fasta	120	895	107400	17982	16.743	630	0.704	501	0.56	0.565	0.435	25982	15978	22995	24463	0	0	0	0	0	0	0	0	0	0	0	0	0	17982	0
6962_CDS.fasta	122	375	45750	10510	22.973	258	0.688	197	0.525	0.576	0.424	10287	5885	9055	10013	0	0	0	0	0	0	0	0	0	0	0	0	0	10510	0
6968_CDS.fasta	118	826	97468	25456	26.117	598	0.724	451	0.546	0.53	0.47	14707	16240	17569	23496	0	0	0	0	0	0	0	0	0	0	0	0	0	25456	0
6969_CDS.fasta	92	303	27876	8985	32.232	207	0.683	151	0.498	0.517	0.483	4829	4362	4740	4960	0	0	0	0	0	0	0	0	0	0	0	0	0	8985	0
6977_CDS.fasta	112	410	45920	22008	47.927	294	0.717	218	0.532	0.582	0.418	8243	3864	6095	5710	0	0	0	0	0	0	0	0	0	0	0	0	0	22008	0
6978_CDS.fasta	123	891	109593	29332	26.764	608	0.682	479	0.538	0.555	0.445	19952	16963	18503	24843	0	0	0	0	0	0	0	0	0	0	0	0	0	29332	0
6979_CDS.fasta	124	903	111972	2604	2.326	636	0.704	518	0.574	0.574	0.426	33158	19781	26765	29664	0	0	0	0	0	0	0	0	0	0	0	0	0	2604	0
6992_CDS.fasta	122	432	52704	14855	28.186	304	0.704	213	0.493	0.612	0.388	12955	6297	8375	10222	0	0	0	0	0	0	0	0	0	0	0	0	0	14855	0
6995_CDS.fasta	105	216	22680	4142	18.263	157	0.727	118	0.546	0.605	0.395	5398	3557	3775	5808	0	0	0	0	0	0	0	0	0	0	0	0	0	4142	0
7013_CDS.fasta	90	516	46440	22382	48.196	310	0.601	196	0.38	0.569	0.431	6736	5084	5184	7054	0	0	0	0	0	0	0	0	0	0	0	0	0	22382	0
7021_CDS.fasta	112	560	62720	25683	40.949	381	0.68	283	0.505	0.577	0.423	10871	5914	9762	10490	0	0	0	0	0	0	0	0	0	0	0	0	0	25683	0
7024_CDS.fasta	63	375	23625	10861	45.972	230	0.613	141	0.376	0.547	0.453	3812	2683	3059	3210	0	0	0	0	0	0	0	0	0	0	0	0	0	10861	0
7028_CDS.fasta	117	406	47502	12298	25.889	319	0.786	281	0.692	0.582	0.418	11065	6195	8494	9450	0	0	0	0	0	0	0	0	0	0	0	0	0	12298	0
7029_CDS.fasta	120	906	108720	51292	47.178	544	0.6	366	0.404	0.573	0.427	14755	11008	13686	17979	0	0	0	0	0	0	0	0	0	0	0	0	0	51292	0
7067_CDS.fasta	121	363	43923	5909	13.453	254	0.7	194	0.534	0.576	0.424	11070	6399	9720	10825	0	0	0	0	0	0	0	0	0	0	0	0	0	5909	0
7111_CDS.fasta	124	672	83328	16691	20.03	488	0.726	390	0.58	0.575	0.425	19837	12151	16202	18447	0	0	0	0	0	0	0	0	0	0	0	0	0	16691	0
7128_CDS.fasta	124	1344	166656	31173	18.705	1062	0.79	853	0.635	0.595	0.405	42158	24226	30473	38626	0	0	0	0	0	0	0	0	0	0	0	0	0	31173	0
7135_CDS.fasta	84	568	47712	20452	42.866	393	0.692	291	0.512	0.544	0.456	5884	5491	6898	8987	0	0	0	0	0	0	0	0	0	0	0	0	0	20452	0
7136_CDS.fasta	110	660	72600	32341	44.547	418	0.633	276	0.418	0.598	0.402	12628	7686	8610	11335	0	0	0	0	0	0	0	0	0	0	0	0	0	32341	0
7141_CDS.fasta	118	681	80358	12134	15.1	474	0.696	390	0.573	0.546	0.454	19525	12229	18646	17824	0	0	0	0	0	0	0	0	0	0	0	0	0	12134	0
7174_CDS.fasta	121	1410	170610	34811	20.404	1062	0.753	873	0.619	0.569	0.431	38766	24655	33592	38786	0	0	0	0	0	0	0	0	0	0	0	0	0	34811	0
7194_CDS.fasta	92	424	39008	11045	28.315	287	0.677	213	0.502	0.538	0.462	7620	5576	7383	7384	0	0	0	0	0	0	0	0	0	0	0	0	0	11045	0
7241_CDS.fasta	59	589	34751	14809	42.615	435	0.739	294	0.499	0.545	0.455	4414	5117	4041	6370	0	0	0	0	0	0	0	0	0	0	0	0	0	14809	0
7273_CDS.fasta	117	387	45279	8525	18.828	262	0.677	206	0.532	0.584	0.416	10382	6859	8408	11105	0	0	0	0	0	0	0	0	0	0	0	0	0	8525	0
7279_CDS.fasta	121	878	106238	22098	20.8	683	0.778	547	0.623	0.568	0.432	23981	15424	20921	23814	0	0	0	0	0	0	0	0	0	0	0	0	0	22098	0
7296_CDS.fasta	106	264	27984	6017	21.502	201	0.761	150	0.568	0.58	0.42	6722	4422	4813	6010	0	0	0	0	0	0	0	0	0	0	0	0	0	6017	0
7313_CDS.fasta	123	1122	138006	22608	16.382	820	0.731	614	0.547	0.528	0.472	27283	21318	33043	33754	0	0	0	0	0	0	0	0	0	0	0	0	0	22608	0
7324_CDS.fasta	124	813	100812	13562	13.453	557	0.685	437	0.538	0.564	0.436	26331	17535	20475	22909	0	0	0	0	0	0	0	0	0	0	0	0	0	13562	0
7325_CDS.fasta	92	501	46092	4729	10.26	344	0.687	283	0.565	0.512	0.488	10721	10615	9546	10481	0	0	0	0	0	0	0	0	0	0	0	0	0	4729	0
7331_CDS.fasta	119	1110	132090	64954	49.174	848	0.764	612	0.551	0.568	0.432	18965	13898	15340	18933	0	0	0	0	0	0	0	0	0	0	0	0	0	64954	0
7333_CDS.fasta	124	750	93000	6537	7.029	554	0.739	463	0.617	0.481	0.519	24819	17903	26948	16793	0	0	0	0	0	0	0	0	0	0	0	0	0	6537	0
7336_CDS.fasta	124	576	71424	13865	19.412	403	0.7	313	0.543	0.466	0.534	13359	12230	18433	13537	0	0	0	0	0	0	0	0	0	0	0	0	0	13865	0
7361_CDS.fasta	89	561	49929	30382	60.85	335	0.597	173	0.308	0.568	0.432	5357	3801	4486	5903	0	0	0	0	0	0	0	0	0	0	0	0	0	30382	0
7363_CDS.fasta	124	495	61380	5092	8.296	320	0.646	263	0.531	0.544	0.456	15083	9951	15732	15522	0	0	0	0	0	0	0	0	0	0	0	0	0	5092	0
7367_CDS.fasta	121	360	43560	5946	13.65	235	0.653	190	0.528	0.558	0.442	11863	7320	9297	9134	0	0	0	0	0	0	0	0	0	0	0	0	0	5946	0
7371_CDS.fasta	124	319	39556	12225	30.906	183	0.574	127	0.398	0.543	0.457	8856	4930	7545	6000	0	0	0	0	0	0	0	0	0	0	0	0	0	12225	0
7572_CDS.fasta	120	1026	123120	38507	31.276	659	0.642	490	0.478	0.554	0.446	23881	16087	21574	23071	0	0	0	0	0	0	0	0	0	0	0	0	0	38507	0
7577_CDS.fasta	104	589	61256	26140	42.673	356	0.604	246	0.418	0.572	0.428	8860	7305	7772	11179	0	0	0	0	0	0	0	0	0	0	0	0	0	26140	0
7583_CDS.fasta	119	845	100555	31452	31.278	597	0.707	475	0.562	0.494	0.506	13943	19929	14806	20425	0	0	0	0	0	0	0	0	0	0	0	0	0	31452	0
7602_CDS.fasta	118	877	103486	19228	18.58	680	0.775	502	0.572	0.513	0.487	20518	18232	22876	22632	0	0	0	0	0	0	0	0	0	0	0	0	0	19228	0
7628_CDS.fasta	122	745	90890	33172	36.497	619	0.831	463	0.621	0.587	0.413	19652	8428	15429	14209	0	0	0	0	0	0	0	0	0	0	0	0	0	33172	0
